# Supplementary material for: Metal-free TBHP-mediated oxidative ring openings of 2-arylimidazopyridines via regioselective cleavage of C–C and C–N bonds
Source: Royal Society of Chemistry journal article supplement (doi:10.1039/c5ra17740e), 2015-01-01

# Supporting Information

## Metal-Free TBHP-Mediated Oxidative Ring Openings of 2-Arylimidazopyridines Via Regioselective Cleavage of C–C and C–N Bonds

Kelu Yan, Daoshan Yang,\* Wei Wei, Guoqing Li, Mingyang Sun, Qingyun Zhang, Laijin Tian, and Hua Wang\*

*Shandong Province Key Laboratory of Life-Organic Analysis, School of Chemistry and Chemical Engineering, Qufu Normal University, Qufu 273165, P. R. China*

*Fax: +86-5374458306*

*yangdaoshan@tsinghua.org.cn; huawang\_qfnu@126.com;*

### Table of contents

|                                                                                     |     |
|-------------------------------------------------------------------------------------|-----|
| General Information                                                                 | P2  |
| Experiments of investigations on the mechanism                                      | P2  |
| General experimental procedures for synthesis of <i>N</i> -(pyridin-2-yl)benzamides | P4  |
| Characterization data of compounds                                                  | P5  |
| References                                                                          | P16 |
| The <sup>1</sup> H and <sup>13</sup> C NMR spectra of compounds <b>2a-2z</b>        | P17 |

## General Information:

All commercially available reagent and chemicals were purchased from chemical suppliers and used as received without further purification. Column chromatography was performed on silica gel (200-300 mesh). Mass analyses and HRMS were obtained on a TOF mass spectrometer.  $^1\text{H}$  NMR and  $^{13}\text{C}$  NMR spectra were recorded in  $\text{CDCl}_3$  with TMS as internal standard (400 MHz  $^1\text{H}$ , 100 MHz  $^{13}\text{C}$ ) at room temperature.

## Experiments of investigations on the mechanism

### (1) General procedure for $\text{H}_2^{18}\text{O}$ labeling experiment

A 25 mL Schlenk tube equipped with a magnetic stirring bar was charged with substituted 2-phenylimidazo[1,2-*a*]pyridines (**1b**) (0.4 mmol), TBHP (1.6 mmol, *tert*-butyl hydroperoxide 70 wt % in  $\text{H}_2^{18}\text{O}$ ), and DCE (2.0 ml). The tube was sealed and then the mixture was allowed to stir under under air atmosphere at 80 °C for 18 h. After the reaction, the resulting mixture was concentrated under vacuum and the residue was purified by flash column chromatography using a mixture of petroleum ether and ethyl acetate (4:1) as an eluent. The products were measured by HRMS.

The HRMS spectra of products was listed as bellow (Figure 1).

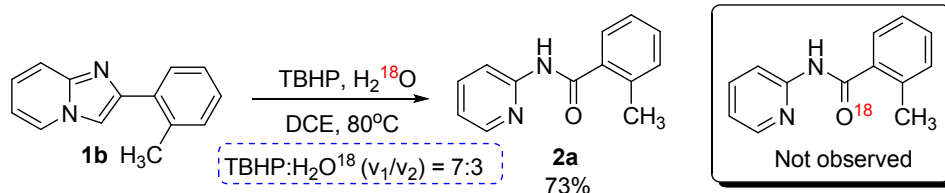

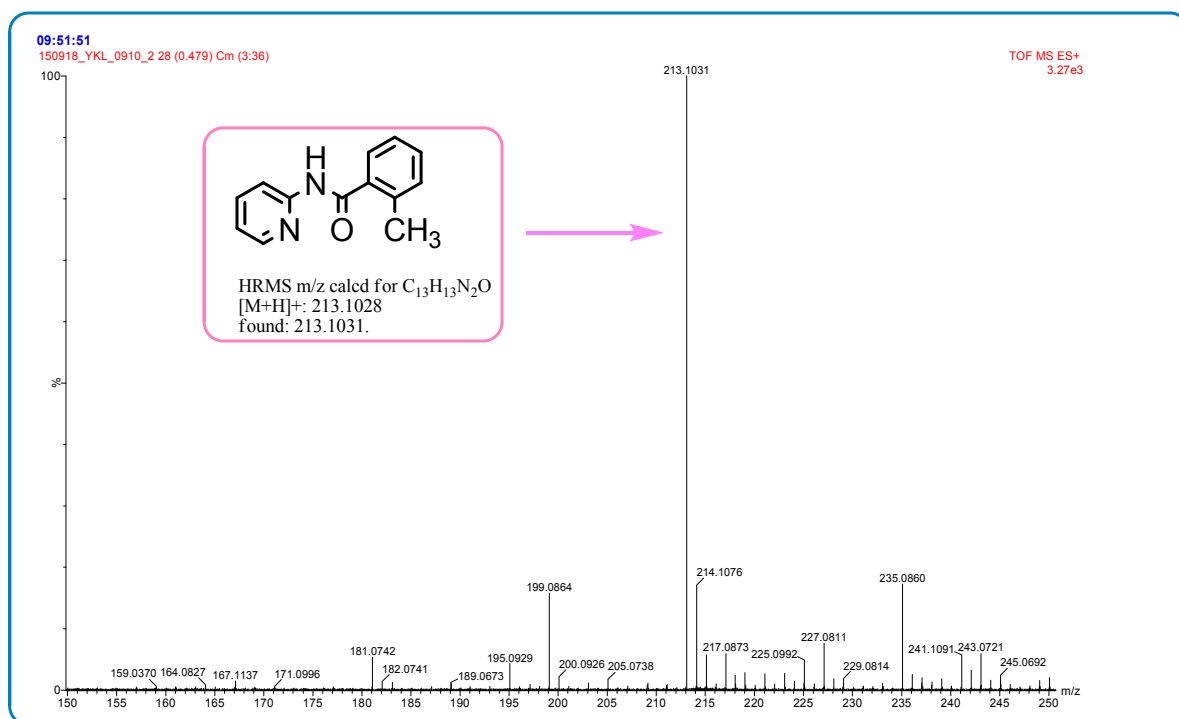

**Figure 1.** The HRMS spectral of  $^{18}\text{O}$  labelled products

## (2) Experiment procedure for the reaction of **1a** with TBHP for a time.

A 25 mL Schlenk tube equipped with a magnetic stirring bar was charged with substituted 2-phenylimidazo[1,2-*a*]pyridines (**1a**) (0.4 mmol), TBHP (4 equiv, *tert*-butyl hydroperoxide 70 wt % in water), and DCE (2.0 ml). The tube was sealed and then the mixture was allowed to stir under air atmosphere at 80 °C for about 6 h. Afterwards, 30  $\mu\text{L}$  of the mixture was quickly taken out into a small tube and analyzed by HRMS. The HRMS spectra of products was listed as bellow (Figure 2).

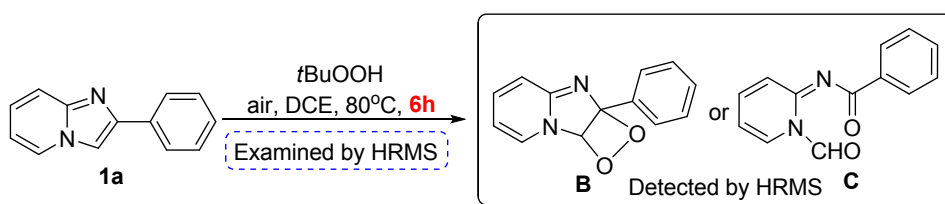

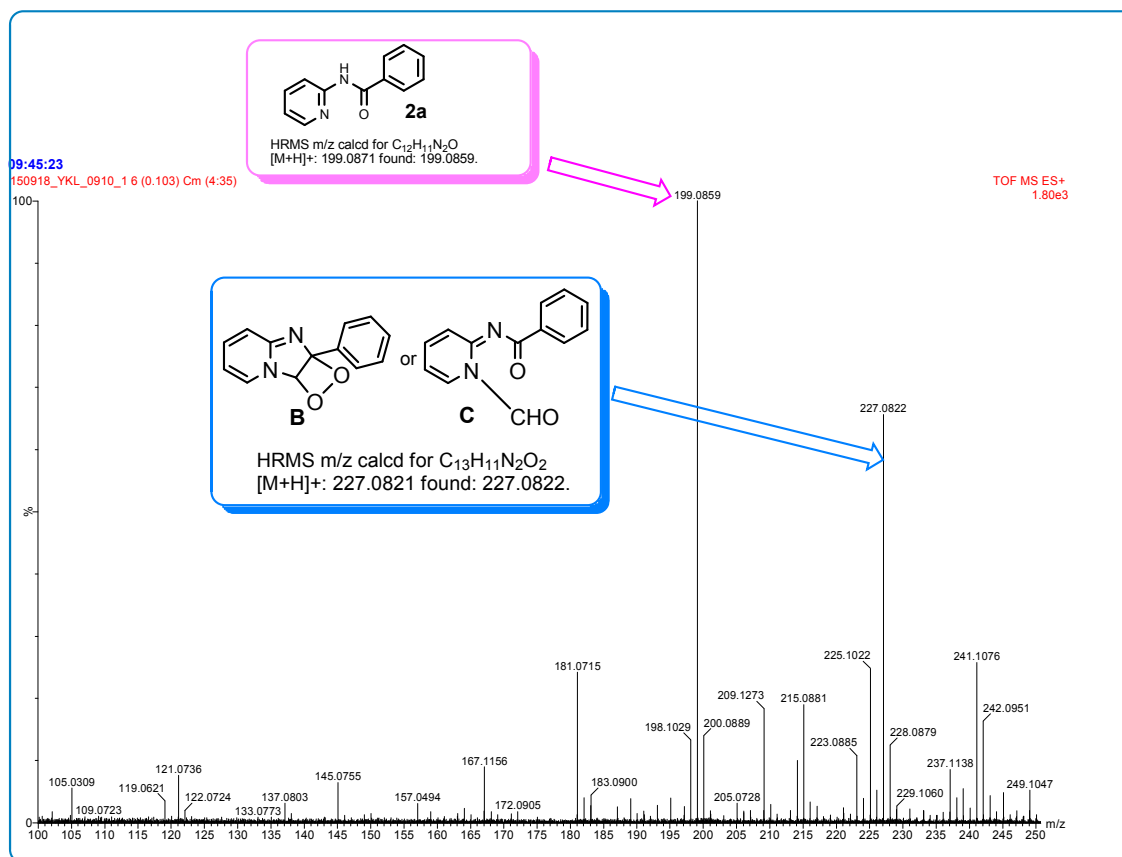

**Figure 2.** HRMS spectrum of the reaction mixture after reaction of **1a** with TBHP for 6h

### General experimental procedures for synthesis of *N*-(pyridin-2-yl)benzamides:

A 25 mL Schlenk tube equipped with a magnetic stirring bar was charged with substituted 2-phenylimidazo[1,2-*a*]pyridines (**1**) (0.4 mmol), TBHP (4 equiv, *tert*-butyl hydroperoxide 70 wt % in water), and DCE (2.0 ml). The tube was sealed and then the mixture was allowed to stir under air atmosphere at 80 °C for 18 h. After completion of the reaction, the resulting solution was cooled down to room temperature, and the solvent was removed with the aid of a rotary evaporator. The residue was purified by column chromatography on silica gel using petroleum ether/ethyl acetate as eluent to provide the desired product (**2**).

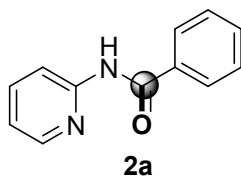

***N*-(Pyridin-2-yl)benzamide (2a):**<sup>[1]</sup> Eluent petroleum ether/ethyl acetate (10:1). white solid, 58 mg, 73% yield. (petroleum ether/ethyl acetate = 3:1, *R<sub>f</sub>* = 0.4). <sup>1</sup>H NMR (CDCl<sub>3</sub>, 400 MHz, ppm) δ 9.38 (br, 1H), 8.43 (d, 1H, *J* = 8.0 Hz), 8.14 (d, 1H, *J* = 4.0 Hz), 7.95 (d, 2H, *J* = 8.0 Hz), 7.75 (t, 1H, *J* = 8.0 Hz), 7.55 (d, 1H, *J* = 8.0 Hz), 7.47 (t, 2H, *J* = 8.0 Hz), 7.03 (t, 1H, *J* = 8.0 Hz), 3.80 (s, 3H), 3.75 (s, br, 2H). <sup>13</sup>C NMR (CDCl<sub>3</sub>, 100 MHz, ppm) δ 166.1, 151.8, 147.6, 138.6, 134.4, 132.2, 128.7, 127.4, 119.8, 114.5. HRMS *m/z* calcd for C<sub>12</sub>H<sub>11</sub>N<sub>2</sub>O [M+H]<sup>+</sup>: 199.0871 found: 199.0859.

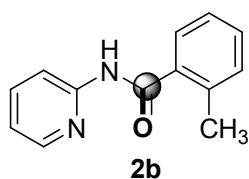

**2-Methyl-*N*-(pyridin-2-yl)benzamide (2b):**<sup>[2]</sup> Eluent petroleum ether/ethyl acetate (10:1). white solid, 56 mg, 66% yield. (petroleum ether/ethyl acetate = 3:1, *R<sub>f</sub>* = 0.5). <sup>1</sup>H NMR (CDCl<sub>3</sub>, 400 MHz, ppm) δ 9.46 (br, 1H), 8.41 (d, 1H, *J* = 8.0 Hz), 7.76-7.71 (m, 2H), 7.53 (d, 1H, *J* = 8.0 Hz), 7.39 (t, 1H, *J* = 8.0 Hz), 7.25 (t, 1H, *J* = 8.0 Hz), 6.94 (t, 1H, *J* = 8.0 Hz), 2.53 (s, 3H). <sup>13</sup>C NMR (CDCl<sub>3</sub>, 100 MHz, ppm) δ 168.7, 151.8, 147.6, 138.5, 136.4, 136.2, 131.2, 130.5, 127.0, 125.9, 119.7, 114.3, 19.8. HRMS *m/z* calcd for C<sub>13</sub>H<sub>13</sub>N<sub>2</sub>O [M+H]<sup>+</sup>: 213.1028 found: 213.1034.

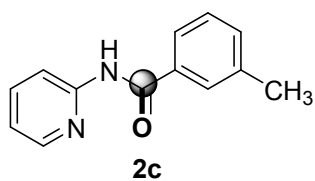

**3-Methyl-N-(pyridin-2-yl)benzamide (2c):**<sup>[3]</sup> Eluent petroleum ether/ethyl acetate (10:1). white solid, 58 mg, 68% yield. (petroleum ether/ethyl acetate = 3:1, R<sub>f</sub> = 0.4). <sup>1</sup>H NMR (CDCl<sub>3</sub>, 400 MHz, ppm) δ 8.88 (br, 1H), 8.42 (d, 1H, *J* = 8.0 Hz), 8.24 (d, 1H, *J* = 4.0 Hz), 7.85 (d, 2H, *J* = 8.0 Hz), 7.75 (t, 1H, *J* = 8.0 Hz), 7.30 (d, 2H, *J* = 8.0 Hz), 7.06 (t, 1H, *J* = 8.0 Hz), 2.44 (s, 3H). <sup>13</sup>C NMR (CDCl<sub>3</sub>, 100 MHz, ppm) δ 165.8, 151.8, 147.8, 142.8, 138.4, 131.5, 129.5, 127.3, 119.8, 114.2, 21.5. HRMS *m/z* calcd for C<sub>13</sub>H<sub>13</sub>N<sub>2</sub>O [M+H]<sup>+</sup>: 213.1028 found: 213.1034.

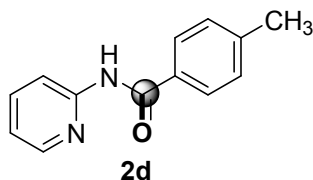

**4-Methyl-N-(pyridin-2-yl)benzamide (2d):**<sup>[4]</sup> Eluent petroleum ether/ethyl acetate (10:1). white solid, 55 mg, 65% yield. (petroleum ether/ethyl acetate = 3:1, R<sub>f</sub> = 0.6). <sup>1</sup>H NMR (CDCl<sub>3</sub>, 400 MHz, ppm) δ 9.15 (br, 1H), 8.42 (d, 1H, *J* = 8.0 Hz), 8.16 (d, 1H, *J* = 4.0 Hz), 7.84 (d, 2H, *J* = 8.0 Hz), 7.75 (t, 1H, *J* = 8.0 Hz), 7.27 (d, 2H, *J* = 8.0 Hz), 7.02 (t, 1H, *J* = 8.0 Hz), 2.42 (s, 3H). <sup>13</sup>C NMR (CDCl<sub>3</sub>, 100 MHz, ppm) δ 165.9, 151.9, 147.8, 142.7, 138.4, 131.5, 129.4, 127.4, 119.7, 114.3, 21.5. HRMS *m/z* calcd for C<sub>13</sub>H<sub>13</sub>N<sub>2</sub>O [M+H]<sup>+</sup>: 213.1028 found: 213.1034.

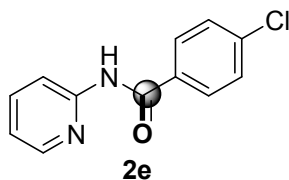

**4-Chloro-N-(pyridin-2-yl)benzamide (2e):**<sup>[5]</sup> Eluent petroleum ether/ethyl acetate (10:1). white solid, 54 mg, 58% yield. (petroleum ether/ethyl acetate = 3:1, R<sub>f</sub> = 0.3). <sup>1</sup>H NMR (CDCl<sub>3</sub>, 400 MHz, ppm) δ 9.17 (br, 1H), 8.39 (d, 1H, *J* = 8.0 Hz), 7.89 (d,

2H,  $J = 8.0$  Hz), 7.77 (t, 1H,  $J = 8.0$  Hz), 7.46 (d, 2H,  $J = 8.0$  Hz), 7.06 (t, 1H,  $J = 8.0$  Hz).  $^{13}\text{C}$  NMR ( $\text{CDCl}_3$ , 100 MHz, ppm)  $\delta$  164.9, 151.6, 147.8, 138.6, 138.5, 132.8, 129.1, 128.8, 120.1, 114.4. HRMS  $m/z$  calcd for  $\text{C}_{12}\text{H}_{10}\text{ClN}_2\text{O}$   $[\text{M}+\text{H}]^+$ : 233.0482 found: 233.0481.

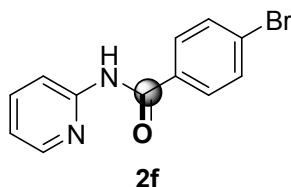

**4-Bromo-*N*-(pyridin-2-yl)benzamide (2f):**<sup>[5]</sup> Eluent petroleum ether/ethyl acetate (10:1). white solid, 74 mg, 67% yield. (petroleum ether/ethyl acetate = 3:1,  $R_f = 0.5$ ).  $^1\text{H}$  NMR ( $\text{CDCl}_3$ , 400 MHz, ppm)  $\delta$  9.29 (br, 1H), 8.38 (d, 1H,  $J = 8.0$  Hz), 8.15 (d, 1H,  $J = 4.0$  Hz), 7.81 (d, 2H,  $J = 8.0$  Hz), 7.76 (t, 1H,  $J = 8.0$  Hz), 7.60 (d, 2H,  $J = 8.0$  Hz), 7.05 (t, 1H,  $J = 8.0$  Hz).  $^{13}\text{C}$  NMR ( $\text{CDCl}_3$ , 100 MHz, ppm)  $\delta$  165.0, 151.6, 147.8, 138.6, 133.2, 132.0, 129.0, 127.0, 120.1, 114.5. HRMS  $m/z$  calcd for  $\text{C}_{12}\text{H}_{10}\text{BrN}_2\text{O}$   $[\text{M}+\text{H}]^+$ : 276.9977, 278.9956 found: 276.9981, 278.9959.

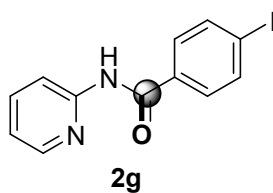

**4-Iodo-*N*-(pyridin-2-yl)benzamide (2g):**<sup>[5]</sup> Eluent petroleum ether/ethyl acetate (10:1). white solid, 86 mg, 66% yield. (petroleum ether/ethyl acetate = 3:1,  $R_f = 0.6$ ).  $^1\text{H}$  NMR ( $\text{CDCl}_3$ , 400 MHz, ppm)  $\delta$  9.58 (br, 1H), 8.43 (d, 1H,  $J = 8.0$  Hz), 7.88-7.53 (m, 3H), 7.23 (d, 2H,  $J = 8.0$  Hz), 7.09 (dd, 1H,  $J = 8.0$  Hz).  $^{13}\text{C}$  NMR ( $\text{CDCl}_3$ , 100 MHz, ppm)  $\delta$  165.4, 151.6, 147.3, 138.9, 137.9, 133.7, 129.1, 120.0, 114.8, 99.5. HRMS  $m/z$  calcd for  $\text{C}_{12}\text{H}_{10}\text{IN}_2\text{O}$   $[\text{M}+\text{H}]^+$ : 324.9838 found: 324.9832.

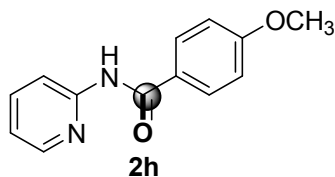

**4-methoxy-*N*-(pyridin-2-yl)benzamide (2h):**<sup>[5]</sup> Eluent petroleum ether/ethyl acetate (10:1). white solid, 57 mg, 63% yield. (petroleum ether/ethyl acetate = 3:1, R<sub>f</sub> = 0.4). <sup>1</sup>H NMR (CDCl<sub>3</sub>, 400 MHz, ppm) δ 8.98 (br, 1H), 8.40 (d, 1H, *J* = 8.0 Hz), 8.21 (d, 1H, *J* = 8.0 Hz), 7.92 (d, 2H, *J* = 8.0 Hz), 7.74 (t, 1H, *J* = 8.0 Hz), 7.03 (t, 1H, *J* = 8.0 Hz), 6.97 (d, 2H, *J* = 8.0 Hz). <sup>13</sup>C NMR (CDCl<sub>3</sub>, 100 MHz, ppm) δ 165.4, 162.8, 151.9, 147.8, 138.4, 129.3, 126.5, 119.6, 114.3, 114.0, 55.5. HRMS *m/z* calcd for C<sub>13</sub>H<sub>13</sub>N<sub>2</sub>O<sub>2</sub> [M+H]<sup>+</sup>: 229.0977 found: 229.0973.

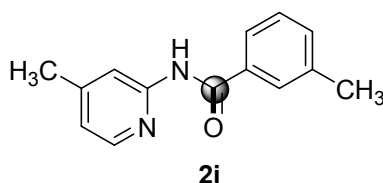

**3-Methyl-*N*-(4-methylpyridin-2-yl)benzamide (2i):** Eluent petroleum ether/ethyl acetate (10:1). white solid, 68 mg, 75% yield. (petroleum ether/ethyl acetate = 3:1, R<sub>f</sub> = 0.4). <sup>1</sup>H NMR (CDCl<sub>3</sub>, 400 MHz, ppm) δ 9.01 (br, 1H), 8.28 (s, 1H), 8.05 (d, 1H, *J* = 4.0 Hz), 7.75-7.72 (m, 2H), 7.38 (d, 1H, *J* = 4.0 Hz), 6.88 (d, 1H, *J* = 4.0 Hz), 2.42 (d, 6H). <sup>13</sup>C NMR (CDCl<sub>3</sub>, 100 MHz, ppm) δ 166.1, 151.8, 150.0, 147.4, 138.6, 134.4, 132.9, 128.7, 127.9, 124.4, 121.0, 114.8, 21.4, 21.3. HRMS *m/z* calcd for C<sub>14</sub>H<sub>15</sub>N<sub>2</sub>O [M+H]<sup>+</sup>: 227.1184 found: 227.1187.

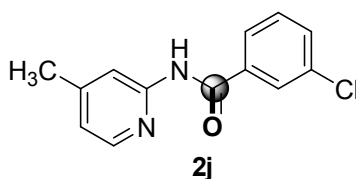

**3-Chloro-*N*-(4-methylpyridin-2-yl)benzamide (2j):** Eluent petroleum ether/ethyl



acetate (10:1). white solid, 58 mg, 59% yield. (petroleum ether/ethyl acetate = 3:1, R<sub>f</sub> = 0.5). <sup>1</sup>H NMR (CDCl<sub>3</sub>, 400 MHz, ppm) δ 9.44 (br, 1H), 8.23 (s, 1H), 7.96 (d, 1H, J = 8.0 Hz), 7.92 (s, 1H), 7.51 (d, 1H, J = 8.0 Hz), 7.39 (t, 1H, J = 8.0 Hz), 6.86 (d, 1H, J = 4.0 Hz), 2.40 (s, 3H). <sup>13</sup>C NMR (CDCl<sub>3</sub>, 100 MHz, ppm) δ 164.8, 151.6, 150.2, 147.3, 136.3, 135.0, 132.1, 130.0, 127.8, 125.4, 121.3, 115.1, 21.4. HRMS m/z calcd for C<sub>13</sub>H<sub>12</sub>ClN<sub>2</sub>O [M+H]<sup>+</sup>: 247.0638 found: 247.0634.

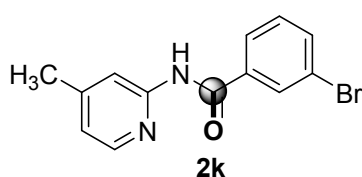

**3-Bromo-N-(4-methylpyridin-2-yl)benzamide (2k):** Eluent petroleum ether/ethyl acetate (10:1). white solid, 88 mg, 76% yield. (petroleum ether/ethyl acetate = 3:1, R<sub>f</sub> = 0.5). <sup>1</sup>H NMR (CDCl<sub>3</sub>, 400 MHz, ppm) δ 9.43 (br, 1H), 8.24 (s, 1H), 8.07 (s, 1H), 7.98 (s, 1H), 7.84 (d, 1H, J = 8.0 Hz), 7.67 (d, 1H, J = 8.0 Hz), 7.33 (t, 1H, J = 8.0 Hz), 6.88 (d, 1H, J = 4.0 Hz), 2.40 (s, 3H). <sup>13</sup>C NMR (CDCl<sub>3</sub>, 100 MHz, ppm) δ 164.6, 151.6, 150.2, 147.3, 136.5, 135.0, 130.7, 130.2, 126.0, 122.9, 121.4, 115.1, 21.5. HRMS m/z calcd for C<sub>13</sub>H<sub>12</sub>BrN<sub>2</sub>O [M+H]<sup>+</sup>: 291.0133, 293.0113 found: 291.0135, 293.0117.

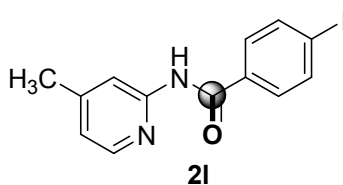

**4-Iodo-N-(4-methylpyridin-2-yl)benzamide (2l):** Eluent petroleum ether/ethyl acetate (10:1). white solid, 97 mg, 72% yield. (petroleum ether/ethyl acetate = 3:1, R<sub>f</sub> = 0.5). <sup>1</sup>H NMR (CDCl<sub>3</sub>, 400 MHz, ppm) δ 9.03 (br, 1H), 8.25-8.09 (m, 2H), 7.85 (d,

2H,  $J = 8.0$  Hz), 7.67 (d, 2H,  $J = 8.0$  Hz), 6.91 (s, 1H), 2.42 (s, 3H).  $^{13}\text{C}$  NMR ( $\text{CDCl}_3$ , 100 MHz, ppm)  $\delta$  165.1, 151.4, 150.3, 147.2, 138.0, 133.8, 128.8, 121.3, 115.0, 99.4, 21.5. HRMS  $m/z$  calcd for  $\text{C}_{13}\text{H}_{12}\text{N}_2\text{O}$   $[\text{M}+\text{H}]^+$ : 338.9994 found: 338.9992.

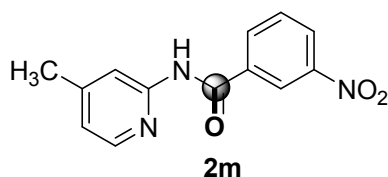

***N*-(4-methylpyridin-2-yl)-3-nitrobenzamide (2m)**: Eluent petroleum ether/ethyl acetate (10:1). white solid, 69 mg, 67% yield. (petroleum ether/ethyl acetate = 3:1,  $R_f = 0.5$ ).  $^1\text{H}$  NMR ( $\text{CDCl}_3$ , 400 MHz, ppm)  $\delta$  9.80 (br, 1H), 8.77 (s, 1H), 8.38 (d, 1H,  $J = 8.0$  Hz), 8.28 (d, 1H,  $J = 8.0$  Hz), 8.21 (s, 1H), 7.95 (s, 1H,  $J = 4.0$  Hz), 7.66 (t, 1H,  $J = 8.0$  Hz), 6.88 (d, 1H,  $J = 4.0$  Hz), 2.40 (s, 3H).  $^{13}\text{C}$  NMR ( $\text{CDCl}_3$ , 100 MHz, ppm)  $\delta$  163.8, 151.4, 150.4, 148.3, 147.2, 136.2, 133.3, 129.9, 126.5, 122.6, 121.6, 115.4, 21.4. HRMS  $m/z$  calcd for  $\text{C}_{13}\text{H}_{12}\text{N}_3\text{O}$   $[\text{M}+\text{H}]^+$ : 258.0879 found: 258.0876.

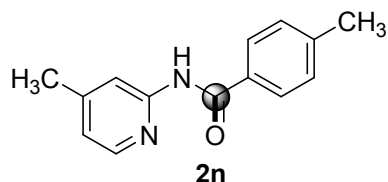

**4-Methyl-*N*-(4-methylpyridin-2-yl)benzamide (2n)**: Eluent petroleum ether/ethyl acetate (10:1). white solid, 68 mg, 75% yield. (petroleum ether/ethyl acetate = 3:1,  $R_f = 0.6$ ).  $^1\text{H}$  NMR ( $\text{CDCl}_3$ , 400 MHz, ppm)  $\delta$  9.08 (br, 1H), 8.28 (s, 1H), 8.08 (d, 1H,  $J = 4.0$  Hz), 7.86 (d, 2H,  $J = 8.0$  Hz), 7.30 (d, 2H,  $J = 8.0$  Hz), 6.89 (d, 1H,  $J = 4.0$  Hz), 2.44 (s, 3H), 2.41 (s, 3H).  $^{13}\text{C}$  NMR ( $\text{CDCl}_3$ , 100 MHz, ppm)  $\delta$  165.8, 151.8, 150.1, 147.2, 142.7, 131.5, 129.4, 127.4, 120.9, 114.9, 21.5, 21.4. HRMS  $m/z$  calcd for  $\text{C}_{14}\text{H}_{15}\text{N}_2\text{O}$   $[\text{M}+\text{H}]^+$ : 227.1184 found: 227.1187.

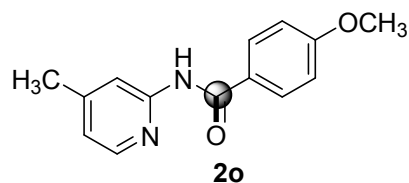

**4-Methoxy-N-(4-methylpyridin-2-yl)benzamide (2o):**<sup>[6]</sup> Eluent petroleum ether/ethyl acetate (10:1). white solid, 69 mg, 71% yield. (petroleum ether/ethyl acetate = 3:1, Rf = 0.4). <sup>1</sup>H NMR (CDCl<sub>3</sub>, 400 MHz, ppm) δ 9.01 (br, 1H), 8.25 (s, 1H), 8.05 (d, 1H, *J* = 8.0 Hz), 7.91 (d, 2H, *J* = 8.0 Hz), 6.96 (d, 2H, *J* = 8.0 Hz), 6.86 (d, 1H, *J* = 8.0 Hz), 3.87 (s, 3H), 2.39 (s, 3H). <sup>13</sup>C NMR (CDCl<sub>3</sub>, 100 MHz, ppm) δ 165.4, 162.8, 151.9, 149.9, 147.3, 129.2, 126.6, 120.9, 114.8, 114.0, 55.4, 21.4. HRMS *m/z* calcd for C<sub>14</sub>H<sub>15</sub>N<sub>2</sub>O<sub>2</sub> [M+H]<sup>+</sup>: 243.1134 found: 243.1131.

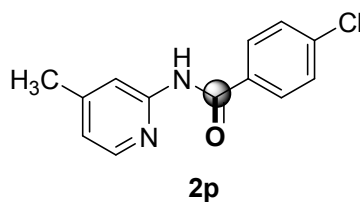

**4-Methoxy-N-(4-methylpyridin-2-yl)benzamide (2p):** Eluent petroleum ether/ethyl acetate (10:1). white solid, 60 mg, 61% yield. (petroleum ether/ethyl acetate = 3:1, Rf = 0.5). <sup>1</sup>H NMR (CDCl<sub>3</sub>, 400 MHz, ppm) δ 9.22 (br, 1H), 8.24 (s, 1H), 8.02 (d, 1H, *J* = 8.0 Hz), 7.89 (d, 2H, *J* = 8.0 Hz), 7.46 (d, 2H, *J* = 8.0 Hz), 6.89 (d, 2H, *J* = 4.0 Hz), 2.42 (s, 3H). <sup>13</sup>C NMR (CDCl<sub>3</sub>, 100 MHz, ppm) δ 164.9, 151.6, 150.2, 147.3, 138.5, 132.8, 129.0, 128.8, 121.3, 115.0, 21.5. HRMS *m/z* calcd for C<sub>13</sub>H<sub>12</sub>ClN<sub>2</sub>O [M+H]<sup>+</sup>: 247.0638 found: 247.0634.

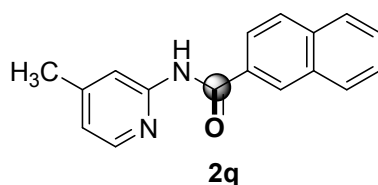

**N-(4-Methylpyridin-2-yl)-2-naphthamide (2q):** Eluent petroleum ether/ethyl acetate

(10:1). white solid, 75 mg, 72% yield. (petroleum ether/ethyl acetate = 3:1, Rf = 0.4).

$^1\text{H}$  NMR ( $\text{CDCl}_3$ , 400 MHz, ppm)  $\delta$  9.39 (br, 1H), 8.45 (s, 1H), 8.33 (s, 1H), 8.04-8.00 (m, 2H), 7.94-7.88 (m, 3H), 7.56 (dt, 2H,  $J = 8.0$  Hz), 6.84 (d, 1H,  $J = 4.0$  Hz), 2.41 (s, 3H).  $^{13}\text{C}$  NMR ( $\text{CDCl}_3$ , 100 MHz, ppm)  $\delta$  166.0, 151.9, 150.1, 147.4, 135.0, 132.6, 131.7, 129.1, 128.7, 128.0, 127.8, 126.9, 123.7, 121.1, 114.9, 21.4. HRMS  $m/z$  calcd for  $\text{C}_{17}\text{H}_{15}\text{N}_2\text{O}$   $[\text{M}+\text{H}]^+$ : 263.1184 found: 263.1190.

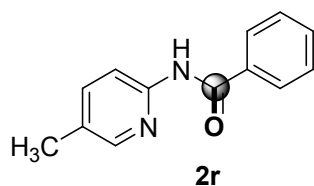

***N*-(5-Methylpyridin-2-yl)benzamide (2r):**<sup>[6]</sup> Eluent petroleum ether/ethyl acetate

(10:1). white solid, 58 mg, 68% yield. (petroleum ether/ethyl acetate = 3:1, Rf = 0.5).

$^1\text{H}$  NMR ( $\text{CDCl}_3$ , 400 MHz, ppm)  $\delta$  9.03 (br, 1H), 8.35 (d, 1H,  $J = 8.0$  Hz), 8.13 (d, 1H,  $J = 8.0$  Hz), 7.98 (d, 2H,  $J = 8.0$  Hz), 7.63-7.57 (m, 2H), 7.54-7.49 (m, 2H), 2.35 (s, 3H).  $^{13}\text{C}$  NMR ( $\text{CDCl}_3$ , 100 MHz, ppm)  $\delta$  165.7, 149.5, 147.3, 139.3, 134.4, 132.1, 129.9, 128.8, 128.3, 127.3, 114.0, 17.8. HRMS  $m/z$  calcd for  $\text{C}_{13}\text{H}_{13}\text{N}_2\text{O}$   $[\text{M}+\text{H}]^+$ : 213.1028 found: 213.1034.

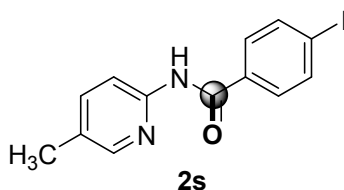

**4-Iodo-*N*-(5-methylpyridin-2-yl)benzamide (2s):** Eluent petroleum ether/ethyl

acetate (10:1). white solid, 91 mg, 67% yield. (petroleum ether/ethyl acetate = 3:1, Rf

= 0.5).  $^1\text{H}$  NMR ( $\text{CDCl}_3$ , 400 MHz, ppm)  $\delta$  8.90 (br, 1H), 8.28 (d, 1H,  $J = 8.0$  Hz),

8.04 (s, 1H), 7.85 (d, 2H,  $J = 8.0$  Hz), 7.65 (d, 2H,  $J = 8.0$  Hz), 7.59 (d, 1H,  $J = 8.0$

Hz), 2.32 (s, 3H).  $^{13}\text{C}$  NMR ( $\text{CDCl}_3$ , 100 MHz, ppm)  $\delta$  165.0, 149.3, 147.7, 139.1, 138.0, 133.9, 129.5, 128.8, 113.9, 99.2, 17.8. HRMS  $m/z$  calcd for  $\text{C}_{13}\text{H}_{12}\text{IN}_2\text{O}$   $[\text{M}+\text{H}]^+$ : 338.9994 found: 338.9992.

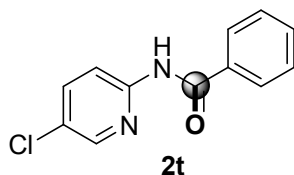

***N*-(5-Chloropyridin-2-yl)benzamide (2t):**<sup>[7]</sup> Eluent petroleum ether/ethyl acetate (10:1). white solid, 54 mg, 58% yield. (petroleum ether/ethyl acetate = 3:1,  $R_f$  = 0.5).  $^1\text{H}$  NMR ( $\text{CDCl}_3$ , 400 MHz, ppm)  $\delta$  8.80 (br, 1H), 8.41 (d, 1H,  $J$  = 8.0 Hz), 8.21 (s, 1H), 7.93 (d, 2H,  $J$  = 8.0 Hz), 7.74 (d, 1H,  $J$  = 8.0 Hz), 7.60 (t, 1H,  $J$  = 8.0 Hz), 7.52 (t, 2H,  $J$  = 8.0 Hz), 2.35 (s, 3H).  $^{13}\text{C}$  NMR ( $\text{CDCl}_3$ , 100 MHz, ppm)  $\delta$  165.7, 149.9, 146.5, 138.1, 134.0, 132.4, 128.9, 128.6, 127.5, 127.2, 114.9. HRMS  $m/z$  calcd for  $\text{C}_{12}\text{H}_{10}\text{ClN}_2\text{O}$   $[\text{M}+\text{H}]^+$ : 233.0482 found: 233.0481.

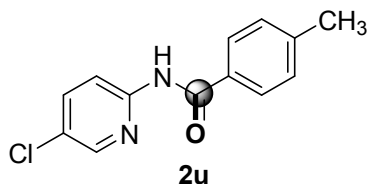

***N*-(5-Chloropyridin-2-yl)-4-methylbenzamide (2u):**<sup>[8]</sup> Eluent petroleum ether/ethyl acetate (10:1). white solid, 61 mg, 62% yield. (petroleum ether/ethyl acetate = 3:1,  $R_f$  = 0.6).  $^1\text{H}$  NMR ( $\text{CDCl}_3$ , 400 MHz, ppm)  $\delta$  8.80 (br, 1H), 8.41 (d, 1H,  $J$  = 8.0 Hz), 8.18 (s, 1H), 7.82 (d, 2H,  $J$  = 8.0 Hz), 7.72 (d, 1H,  $J$  = 8.0 Hz), 7.30 (d, 2H,  $J$  = 8.0 Hz), 2.41 (s, 3H).  $^{13}\text{C}$  NMR ( $\text{CDCl}_3$ , 100 MHz, ppm)  $\delta$  165.6, 150.1, 146.5, 143.1, 138.0, 131.1, 129.5, 127.4, 127.3, 114.9, 21.5. HRMS  $m/z$  calcd for  $\text{C}_{13}\text{H}_{12}\text{ClN}_2\text{O}$   $[\text{M}+\text{H}]^+$ : 247.0638 found: 247.0634.

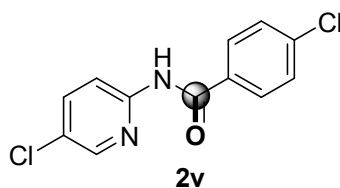

**4-Chloro-*N*-(5-chloropyridin-2-yl)benzamide (2v):**<sup>[8]</sup> Eluent petroleum ether/ethyl acetate (10:1). white solid, 61 mg, 57% yield. (petroleum ether/ethyl acetate = 3:1, R<sub>f</sub> = 0.4). <sup>1</sup>H NMR (CDCl<sub>3</sub>, 400 MHz, ppm) δ 8.72 (br, 1H), 8.37 (d, 1H, *J* = 8.0 Hz), 8.22 (s, 1H), 7.87 (d, 2H, *J* = 8.0 Hz), 7.74 (d, 1H, *J* = 8.0 Hz), 7.49 (d, 2H, *J* = 8.0 Hz), 2.41 (s, 3H). <sup>13</sup>C NMR (CDCl<sub>3</sub>, 100 MHz, ppm) δ 164.5, 149.7, 146.6, 138.9, 138.2, 132.3, 129.2, 128.8, 128.7, 114.9. HRMS *m/z* calcd for C<sub>12</sub>H<sub>9</sub>Cl<sub>2</sub>N<sub>2</sub>O [M+H]<sup>+</sup>: 267.0092 found: 267.0094.

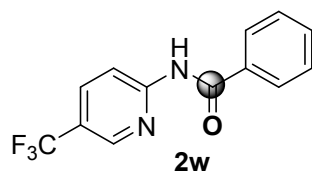

***N*-(5-(Trifluoromethyl)pyridin-2-yl)benzamide (2w):** Eluent petroleum ether/ethyl acetate (10:1). white solid, 67 mg, 63% yield. (petroleum ether/ethyl acetate = 3:1, R<sub>f</sub> = 0.5). <sup>1</sup>H NMR (CDCl<sub>3</sub>, 400 MHz, ppm) δ 9.18 (br, 1H), 8.56 (d, 1H, *J* = 8.0 Hz), 8.41 (s, 1H), 7.99-7.93 (m, 3H), 7.62 (t, 1H, *J* = 8.0 Hz), 7.52 (t, 2H, *J* = 8.0 Hz), 2.41 (s, 3H). <sup>13</sup>C NMR (CDCl<sub>3</sub>, 100 MHz, ppm) δ 166.1, 154.3, 145.3 (q, *J* = 0.4), 135.8 (q, *J* = 0.3), 133.8, 132.7, 128.9, 127.4, 123.5 (q, *J* = 270), 122.6 (q, *J* = 24.8), 113.6. HRMS *m/z* calcd for C<sub>13</sub>H<sub>10</sub>F<sub>3</sub>N<sub>2</sub>O [M+H]<sup>+</sup>: 267.0745 found: 267.0748.

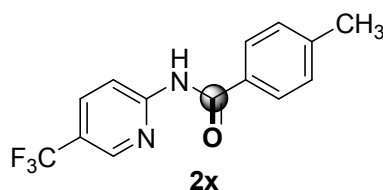

**4-Methyl-*N*-(5-(trifluoromethyl)pyridin-2-yl)benzamide (2x):** Eluent petroleum

ether/ethyl acetate (10:1). white solid, 74 mg, 66% yield. (petroleum ether/ethyl acetate = 3:1, Rf = 0.4). <sup>1</sup>H NMR (CDCl<sub>3</sub>, 400 MHz, ppm) δ 9.18 (br, 1H), 8.55 (d, 1H, *J* = 8.0 Hz), 8.37 (s, 1H), 7.96 (d, 1H, *J* = 8.0 Hz), 7.83 (d, 2H, *J* = 8.0 Hz), 7.31 (d, 2H, *J* = 8.0 Hz), 2.45 (s, 3H). <sup>13</sup>C NMR (CDCl<sub>3</sub>, 100 MHz, ppm) δ 166.1, 154.4, 145.3 (q, *J* = 0.4), 143.5, 135.7 (q, *J* = 0.3), 131.0, 129.6, 127.4, 123.2 (q, *J* = 250.1), 122.4 (q, *J* = 33.0), 113.5, 21.5. HRMS *m/z* calcd for C<sub>14</sub>H<sub>12</sub>F<sub>3</sub>N<sub>2</sub>O [M+H]<sup>+</sup>: 281.0902 found: 281.0905.

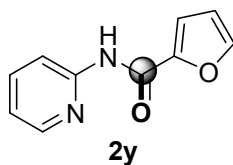

***N*-(Pyridin-2-yl)furan-2-carboxamide (2y):**<sup>[6]</sup> Eluent petroleum ether/ethyl acetate (10:1). white solid, 39 mg, 52% yield. (petroleum ether/ethyl acetate = 3:1, Rf = 0.5). <sup>1</sup>H NMR (CDCl<sub>3</sub>, 400 MHz, ppm) δ 8.81 (br, 1H), 8.33-8.35 (m, 2H), 7.76 (t, 1H, *J* = 8.0 Hz), 7.55 (s, 1H), 7.29 (d, 1H, *J* = 4.0 Hz), 7.09 (t, 1H, *J* = 8.0 Hz), 6.59 (dd, 1H, *J* = 4.0 Hz). <sup>13</sup>C NMR (CDCl<sub>3</sub>, 100 MHz, ppm) δ 156.2, 151.0, 148.0, 147.4, 144.7, 138.4, 119.9, 115.9, 114.1, 112.7. HRMS *m/z* calcd for C<sub>10</sub>H<sub>9</sub>N<sub>2</sub>O<sub>2</sub> [M+H]<sup>+</sup>: 189.0664 found: 189.0667.

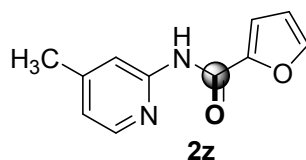

***N*-(4-Methylpyridin-2-yl)furan-2-carboxamide (2z):**<sup>[9]</sup> Eluent petroleum ether/ethyl acetate (10:1). white solid, 44 mg, 54% yield. (petroleum ether/ethyl acetate = 3:1, Rf = 0.5). <sup>1</sup>H NMR (CDCl<sub>3</sub>, 400 MHz, ppm) δ 8.77 (br, 1H), 8.19 (s, 1H), 8.18 (s, 1H), 7.54 (s, 1H), 7.28 (d, 1H, *J* = 4.0 Hz), 6.90 (d, 1H, *J* = 4.0 Hz), 6.92 (d, 1H, *J* = 4.0 Hz), 6.58 (d, 1H, *J* = 8.0 Hz), 2.41 (s, 3H). <sup>13</sup>C NMR (CDCl<sub>3</sub>, 100 MHz, ppm) δ 156.1,

151.0, 149.9, 147.6, 147.5, 144.7, 121.2, 115.8, 114.7, 112.6, 21.4. HRMS m/z calcd for C<sub>11</sub>H<sub>11</sub>N<sub>2</sub>O<sub>2</sub> [M+H]<sup>+</sup>: 203.0824 found: 203.0827.

## References

- [1] W. Fan, Y. Yang, J. Lei, Q. Jiang, W. Zhou, *J. Org. Chem.* **2015**, *80*, 8782.
- [2] L. Ferrins, M. Gazdik, R. Rahmani, S. Varghese, M. L. Sykes, A. J. Jones, V. M. Avery, K. L. White, E. Ryan, S. A. Charman, M. Kaiser, C. A. S. Bergstrom, J. B. Baell, *J. Med. Chem.* **2014**, *57*, 6393.
- [3] P. Mocilac, M. Tallon, A. J. Lough, J. F. Gallagher, *CrystEngComm.* **2010**, *12*, 3080.
- [4] S. Ko, H. Han, S. Chang, *Org. Lett.* **2003**, *5*, 2687.
- [5] P. Subramanian, S. Indu, K. P. Kaliappan, *Org. Lett.* **2014**, *16*, 6212.
- [6] S. Yang, H. Yan, X. Ren, X. Shi, J. Li, Y. Wang, G. Huang, *Tetrahedron.* **2013**, *69*, 6431.
- [7] L. Nicolas, P. Angibaud, I. Stansfield, L. Meerpoel, S. Reymond, J. Cossy, *RSC Adv.* **2013**, *3*, 18787.
- [8] S. George, P. Shanmugapandiyan, *Int. J. ChemTech Res.* **2013**, *5*, 2603.
- [9] S. Biniecki, W. Modrzejewska, *Acta. Pol. Pharm.* **1977**, *34*, 341.



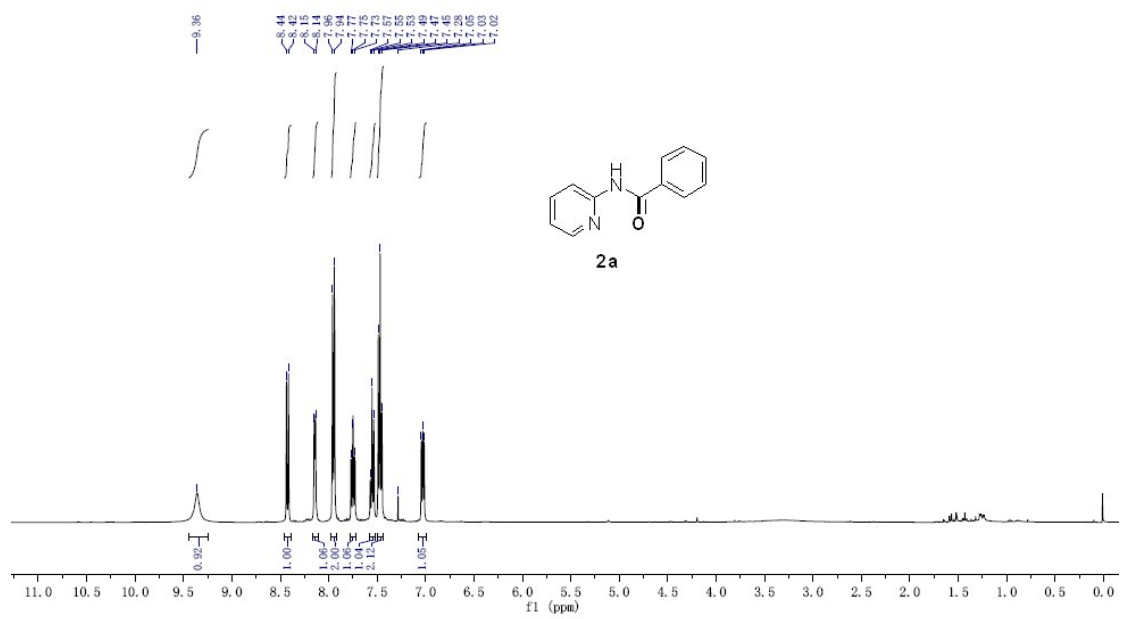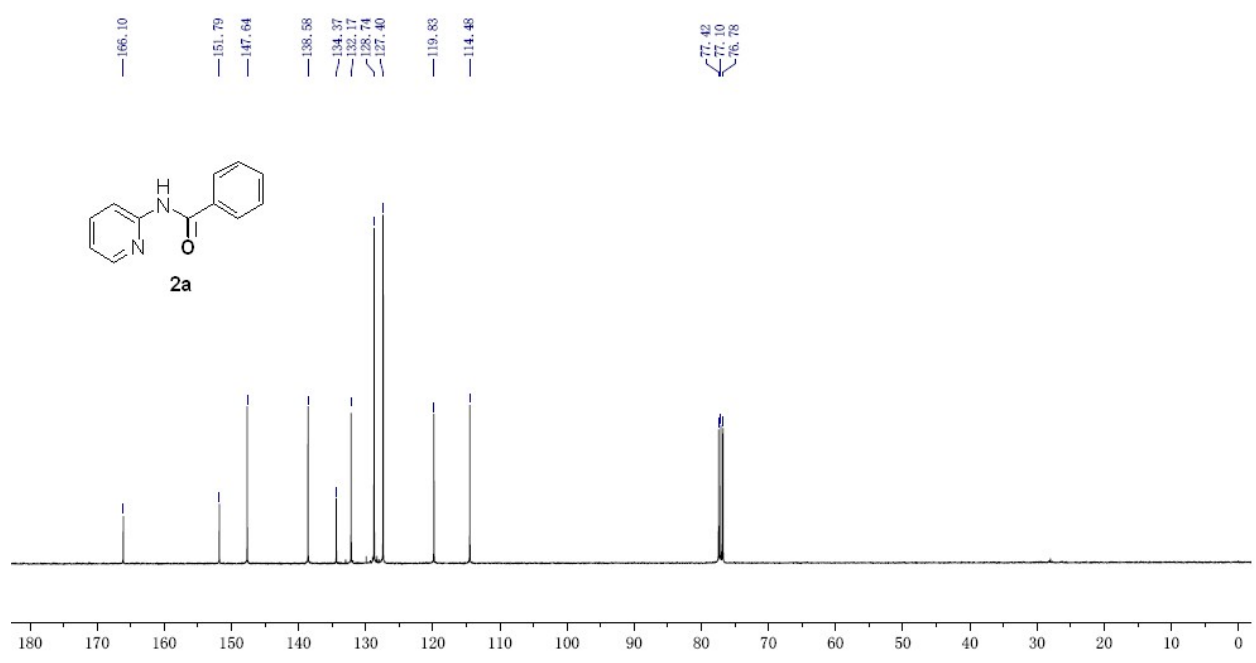

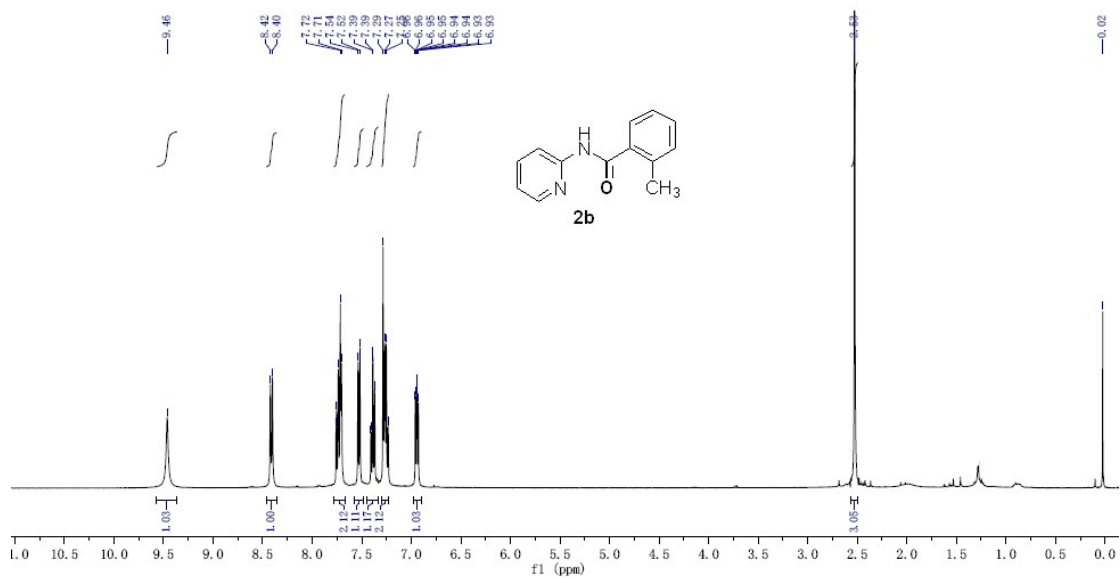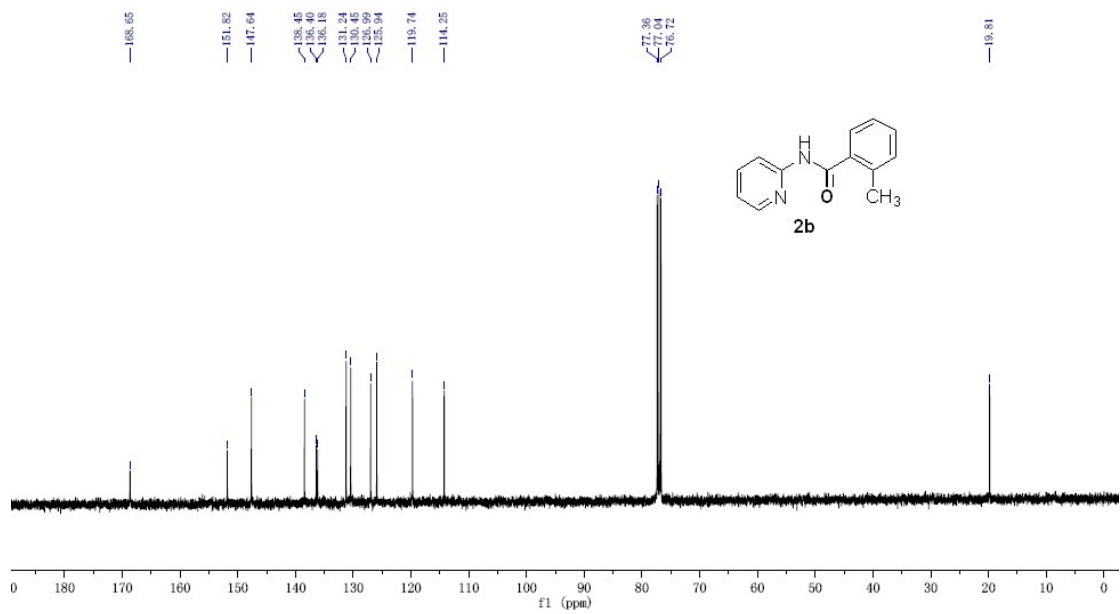

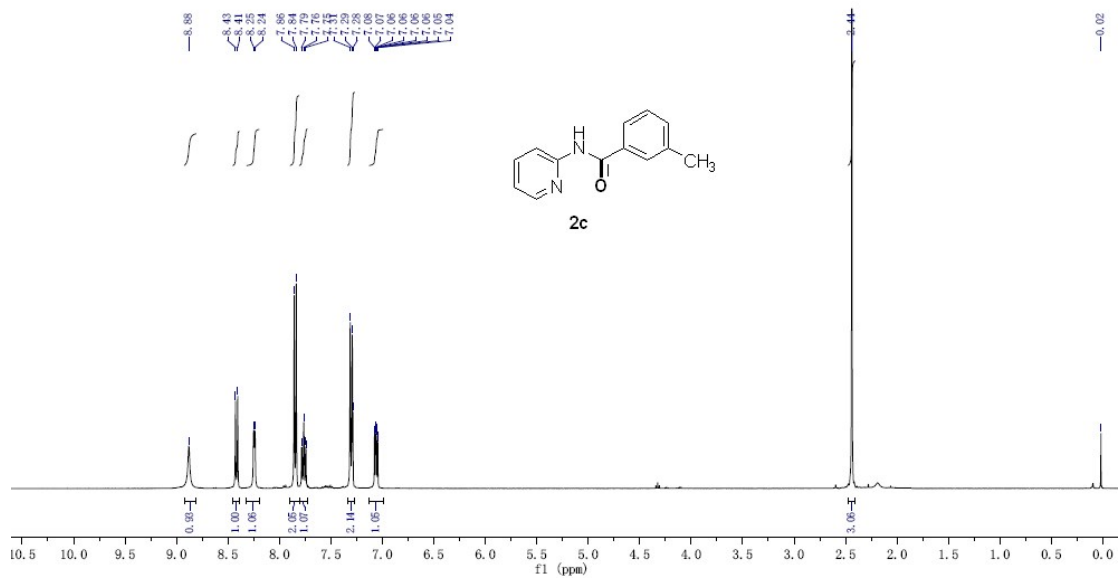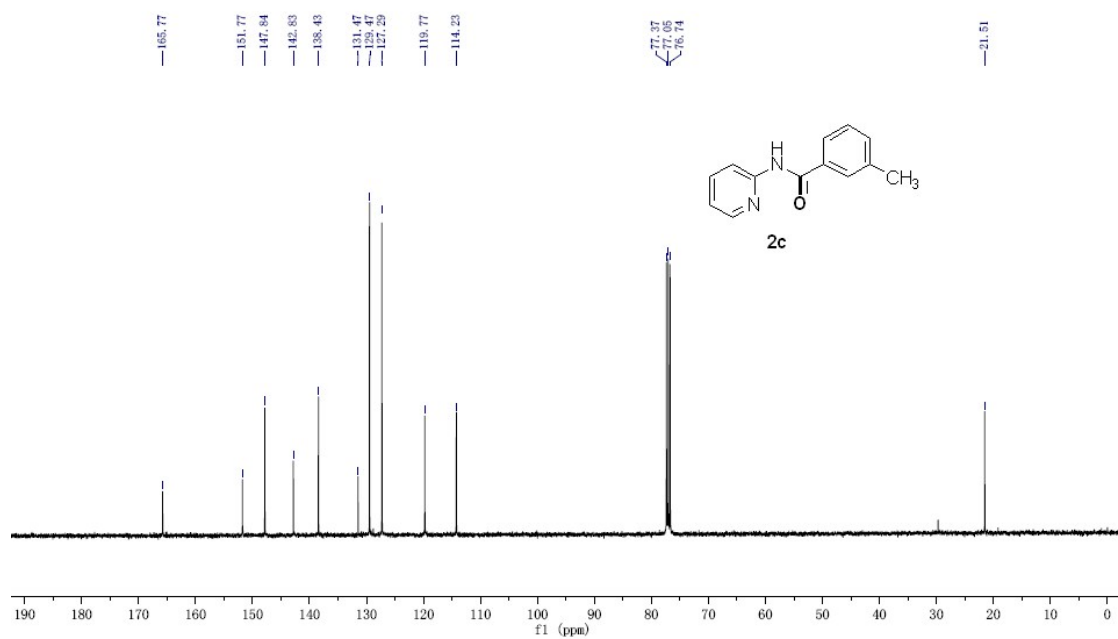

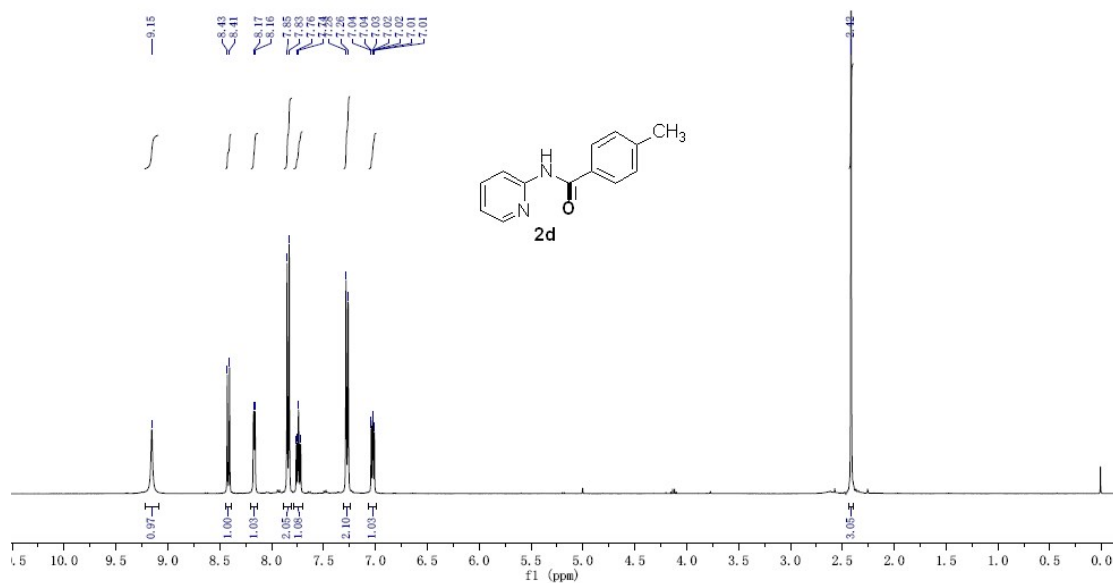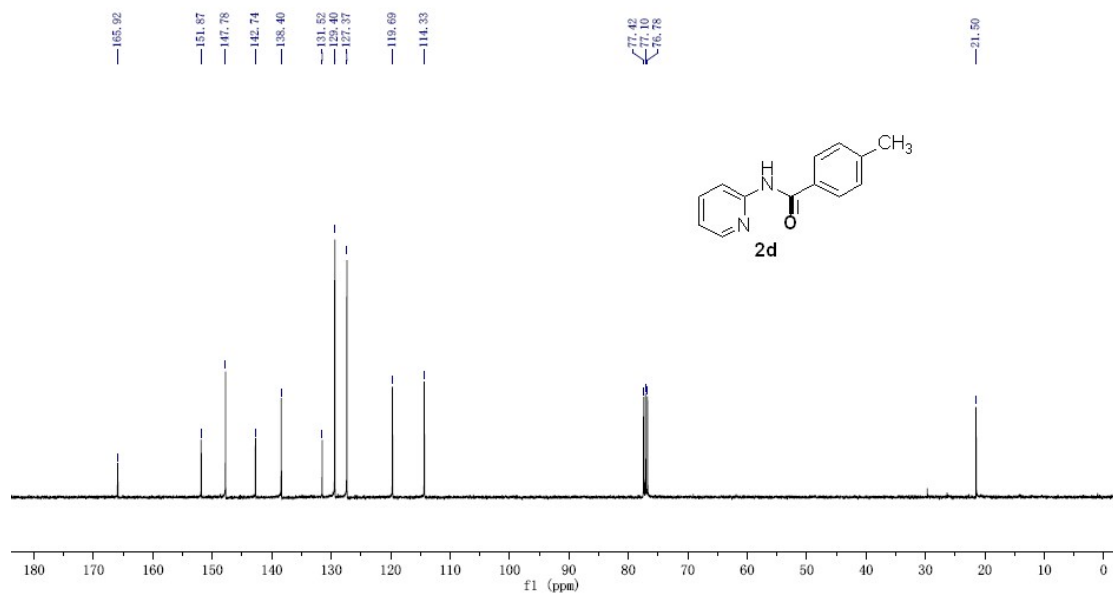

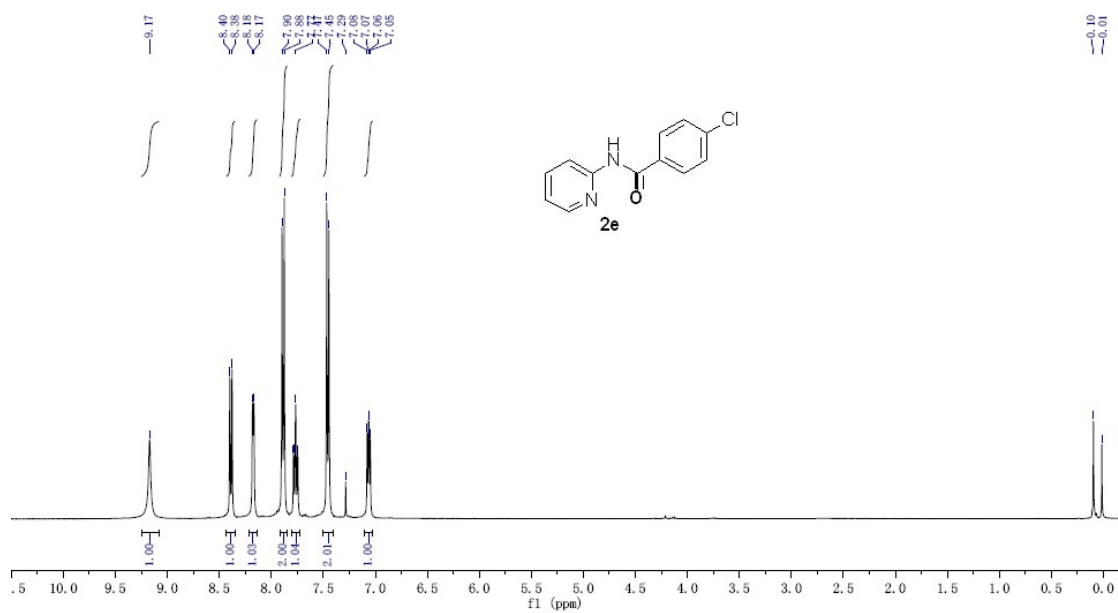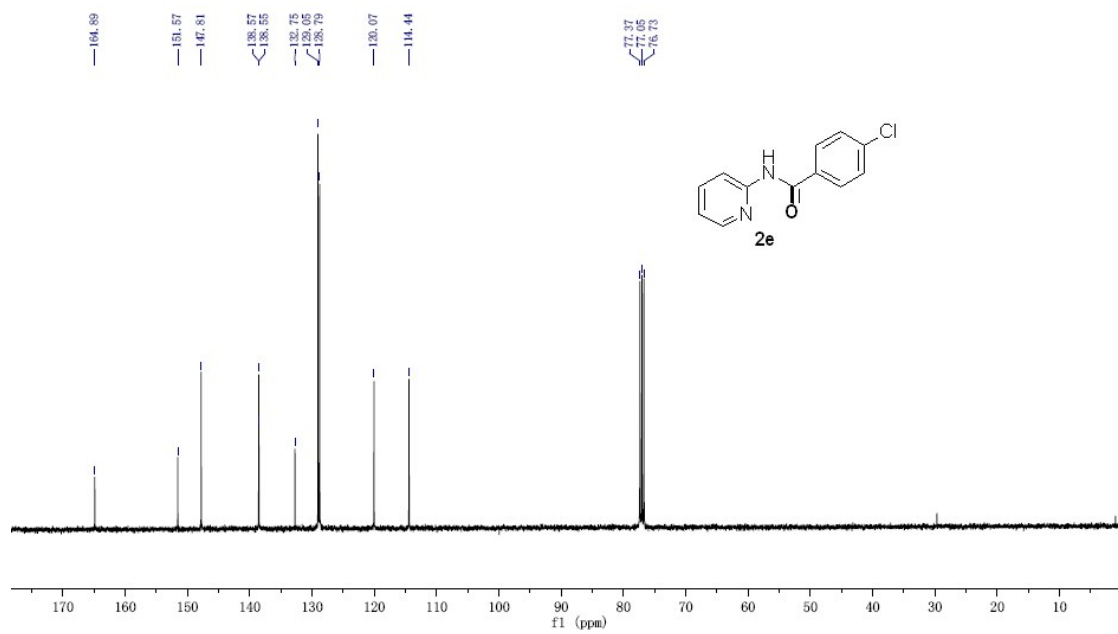

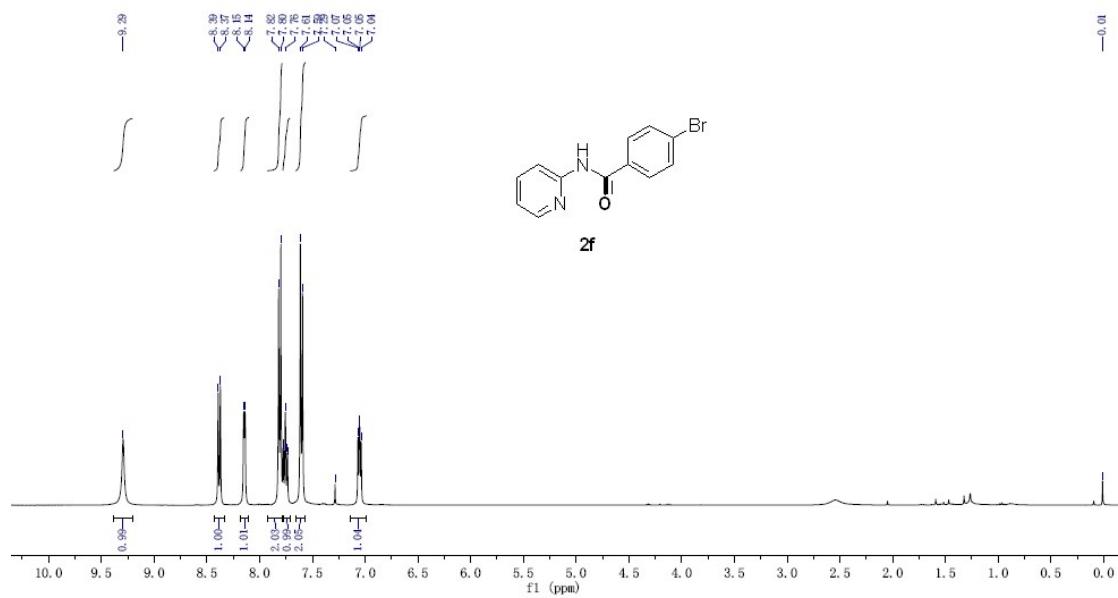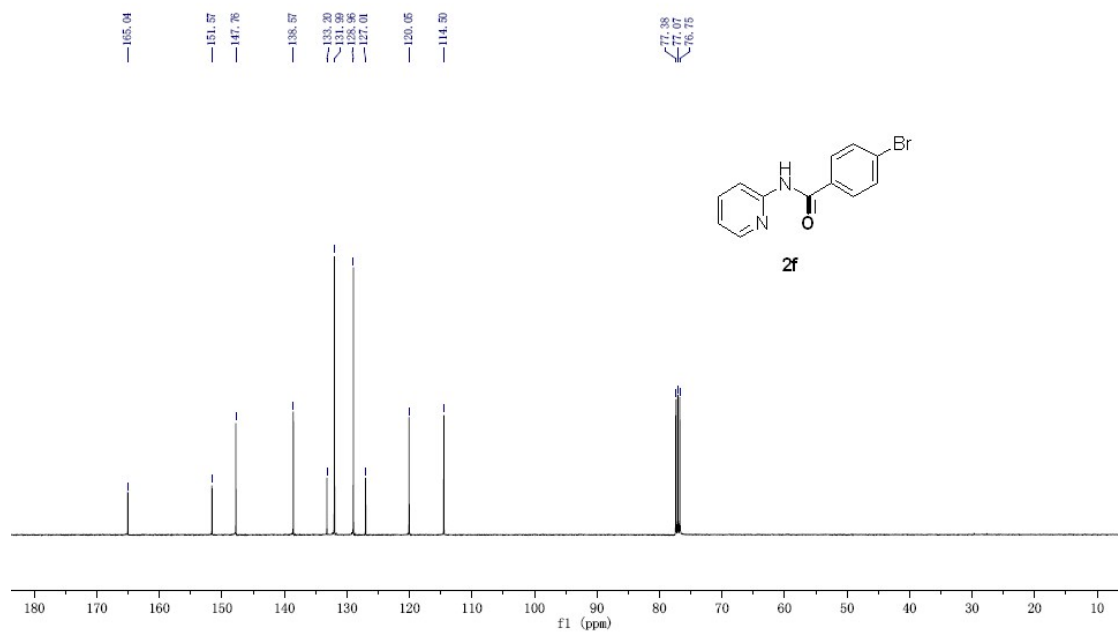

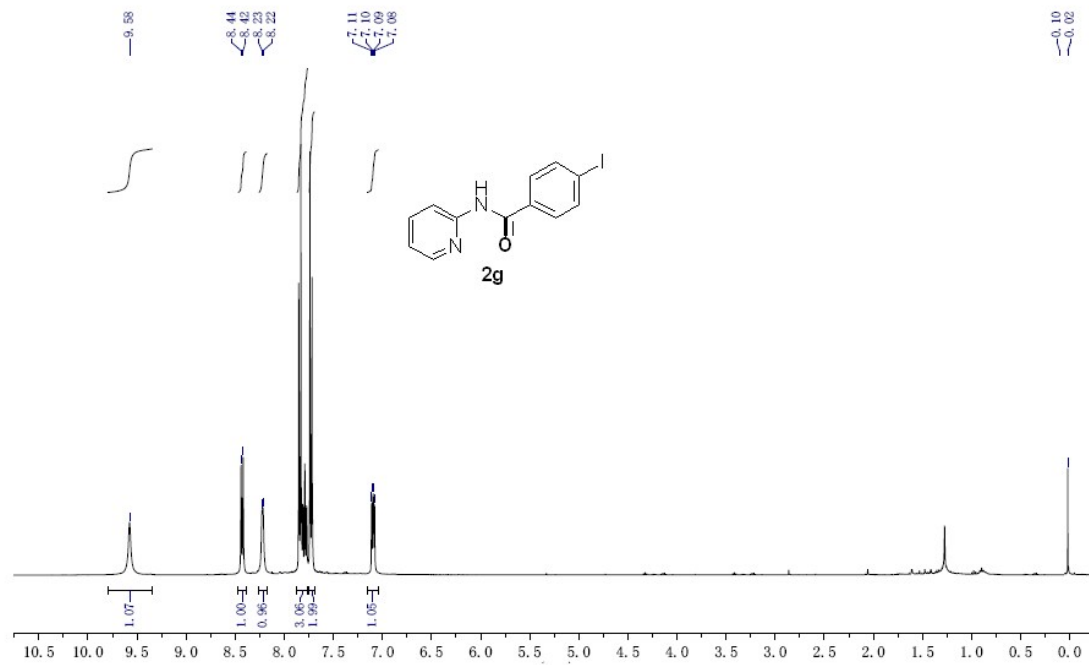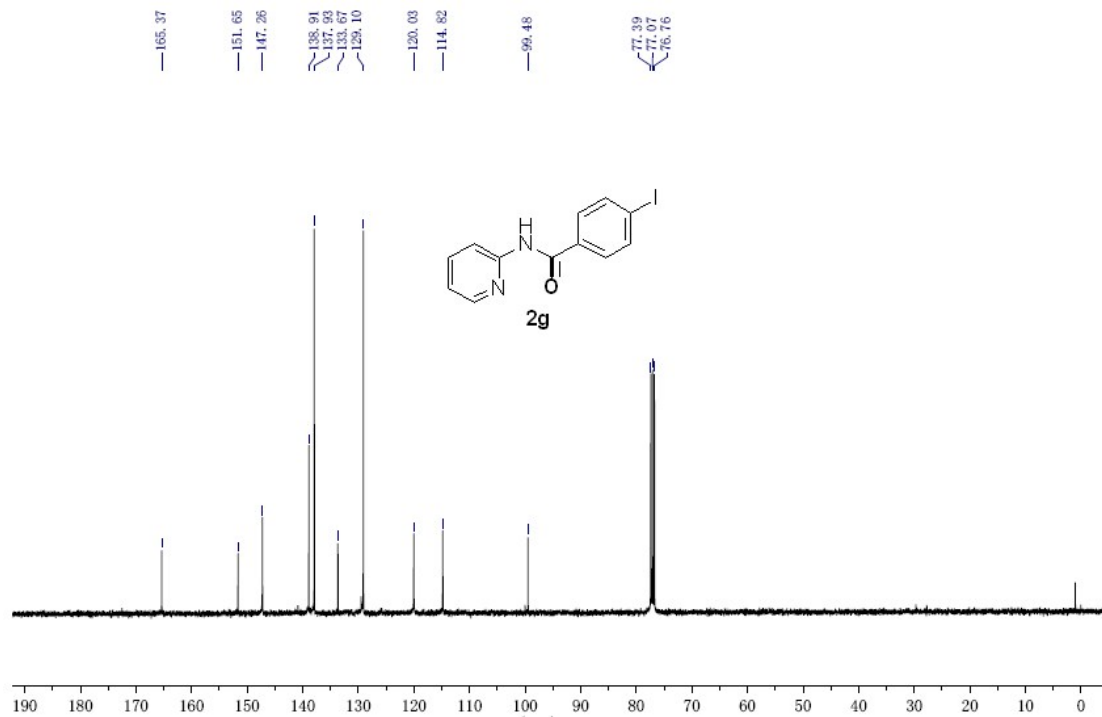

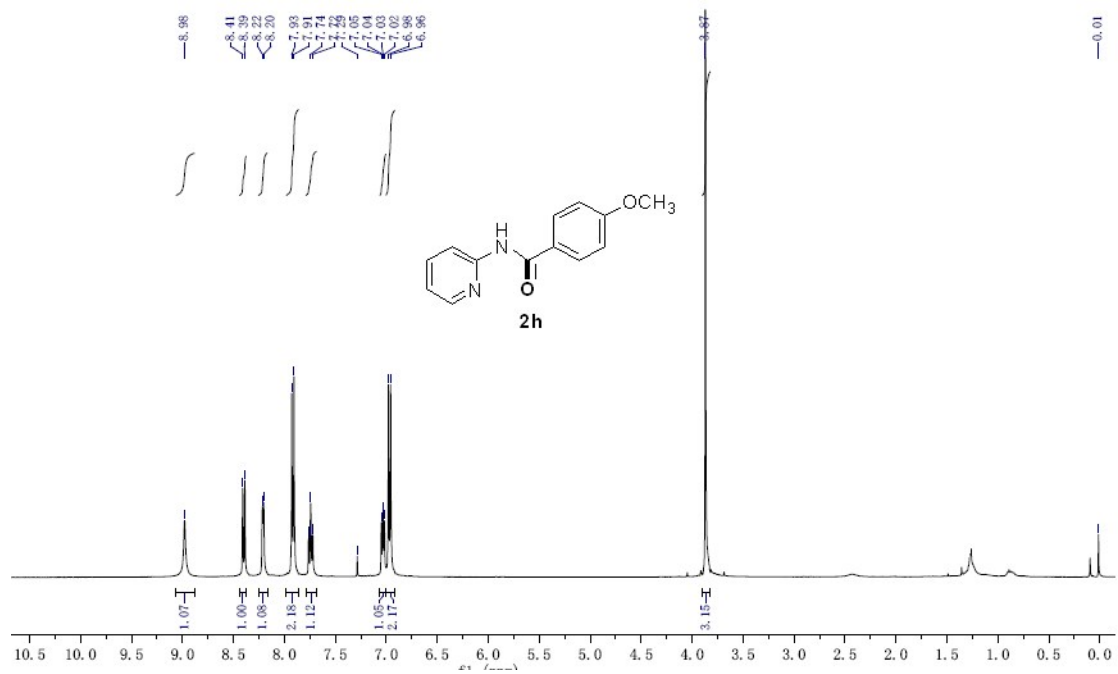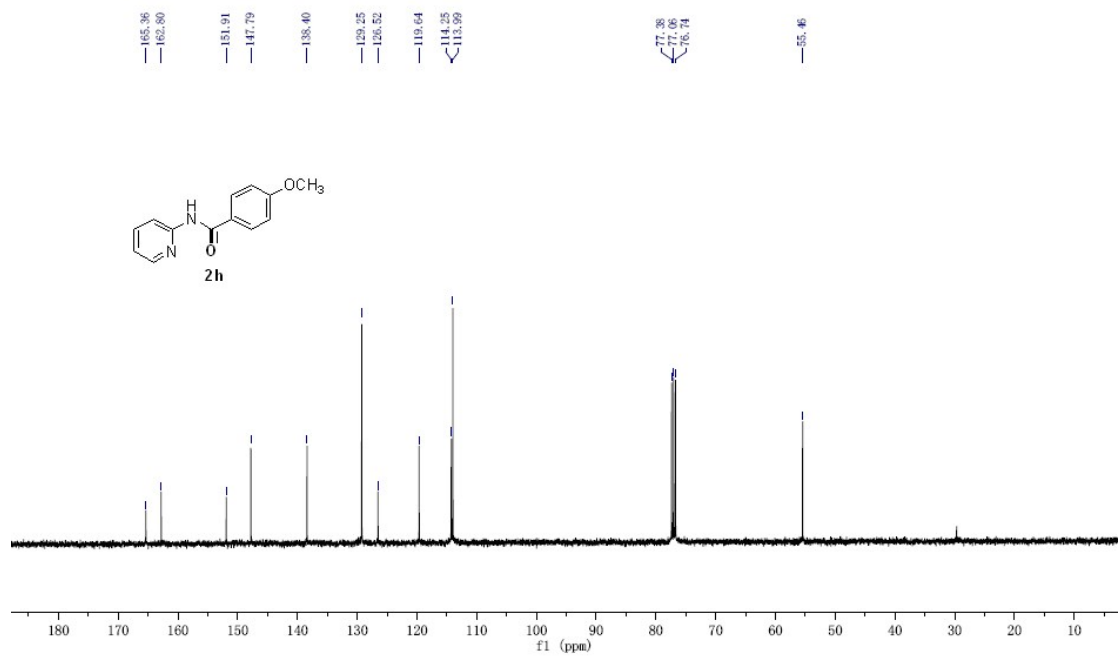



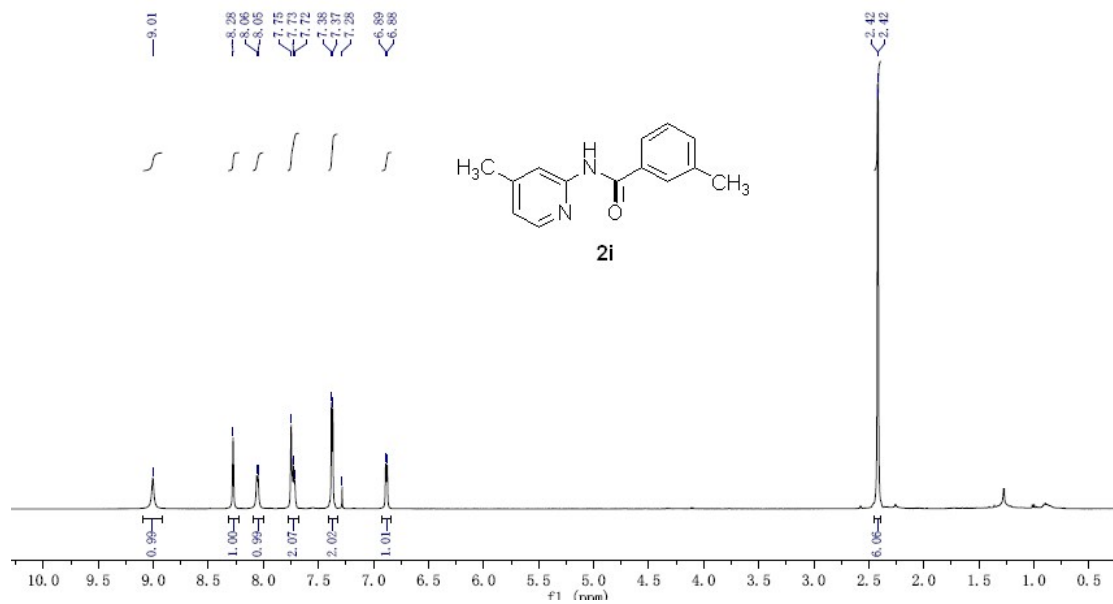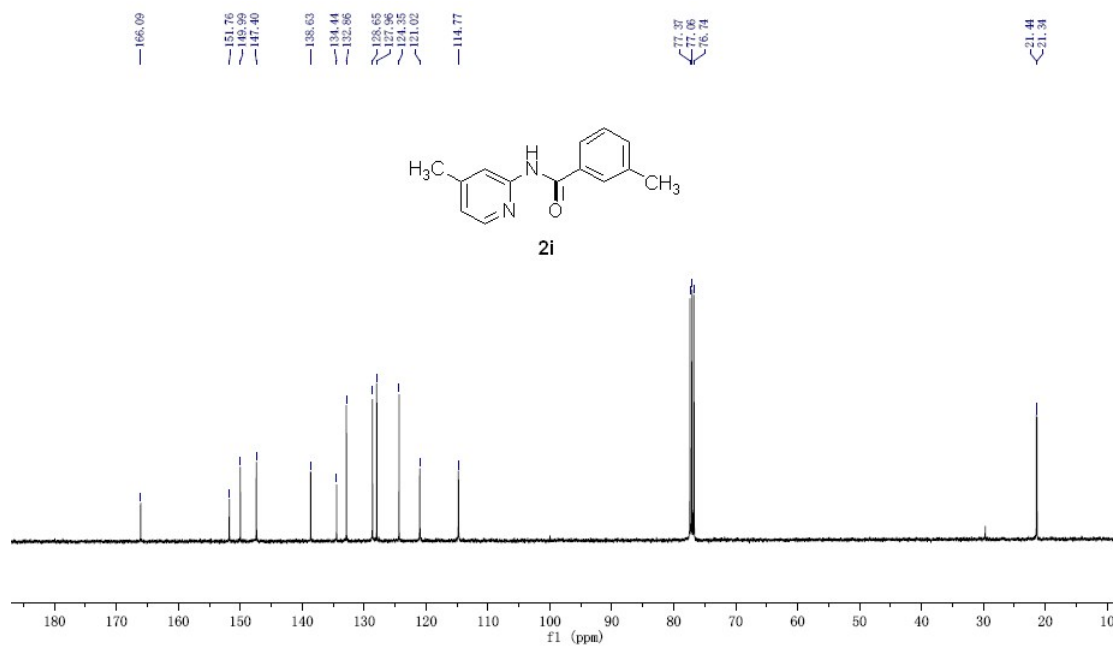

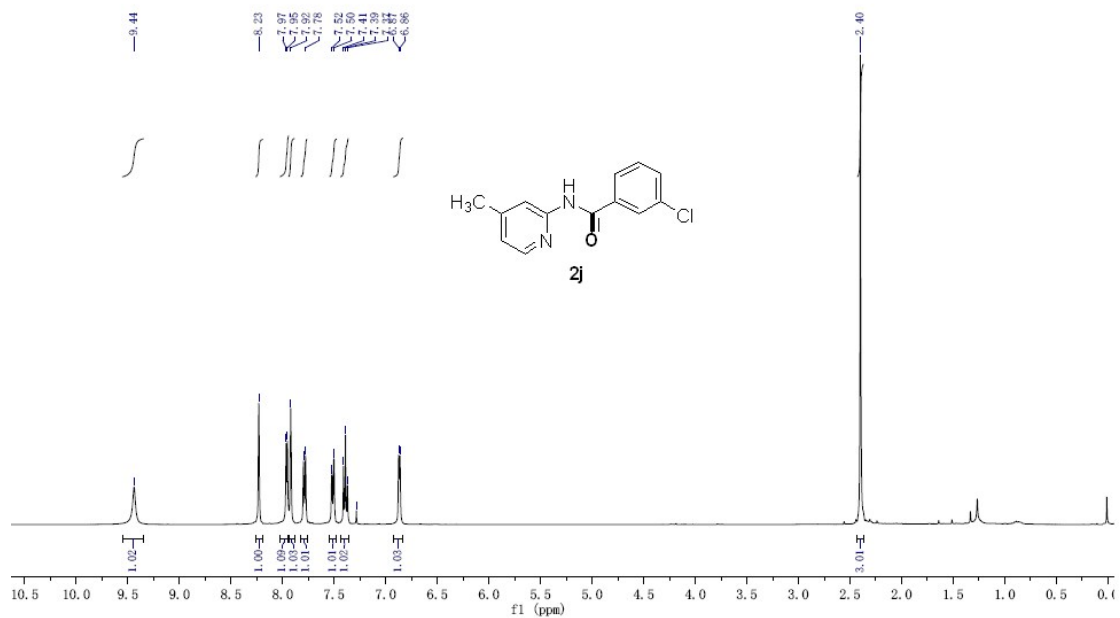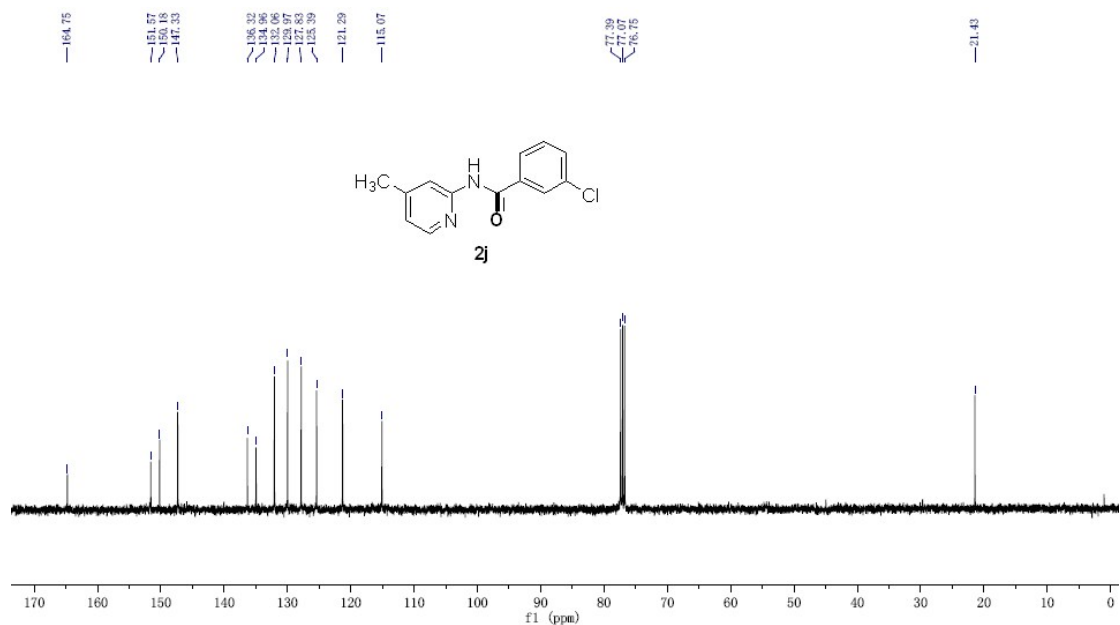

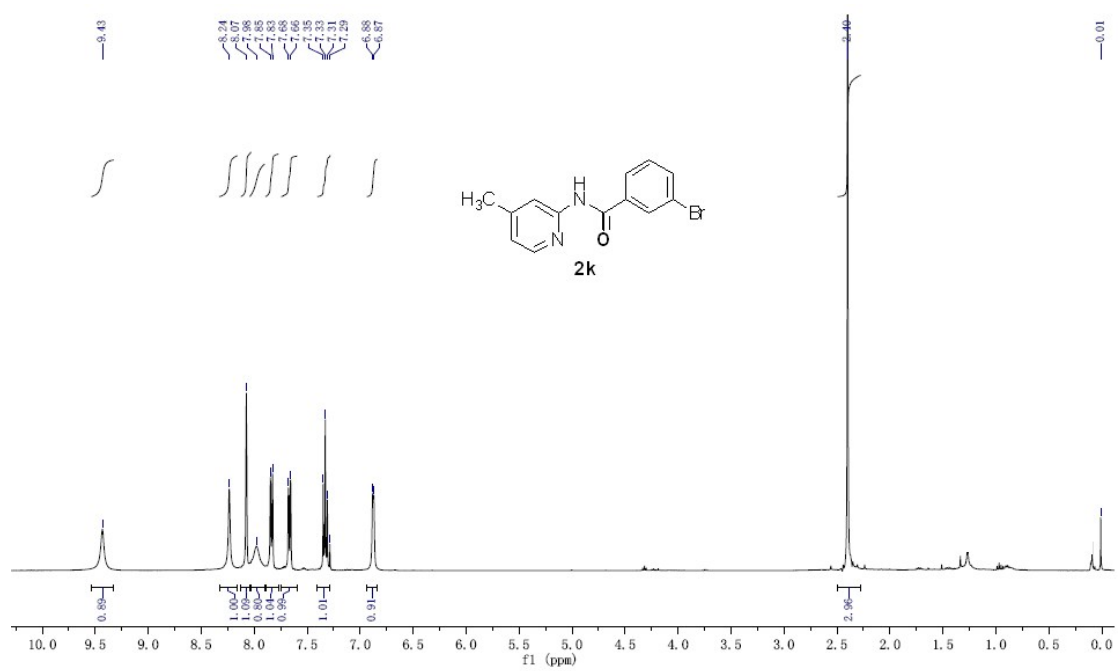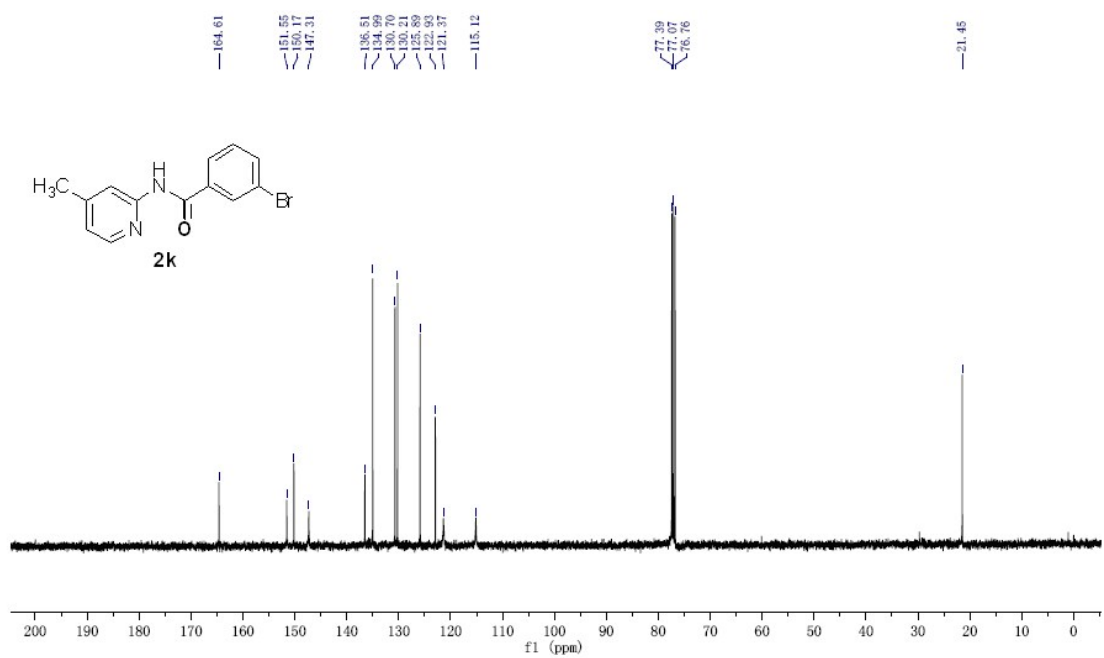

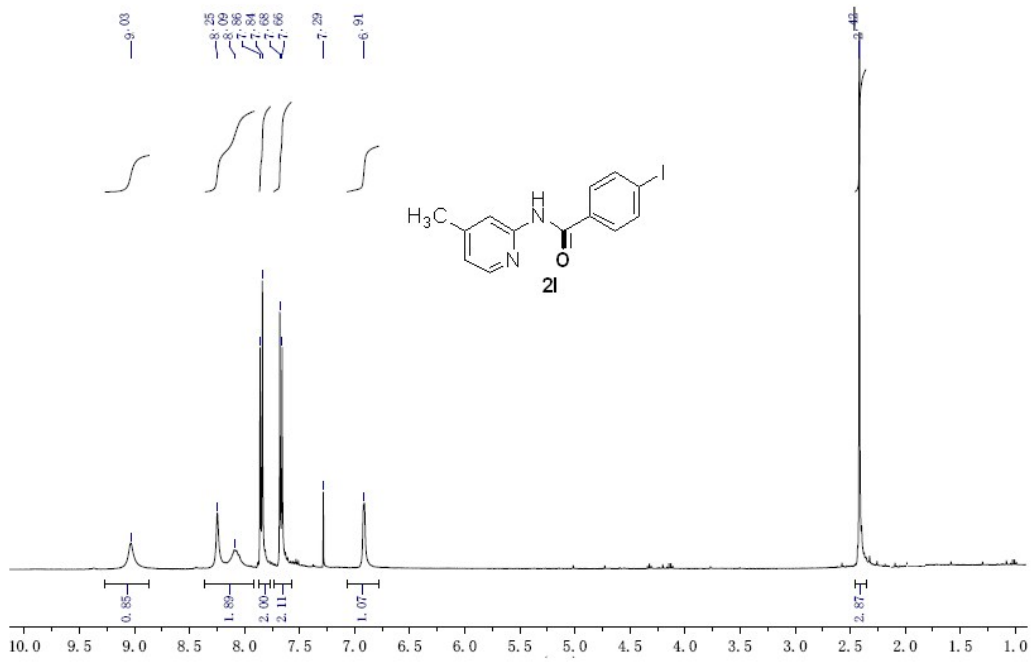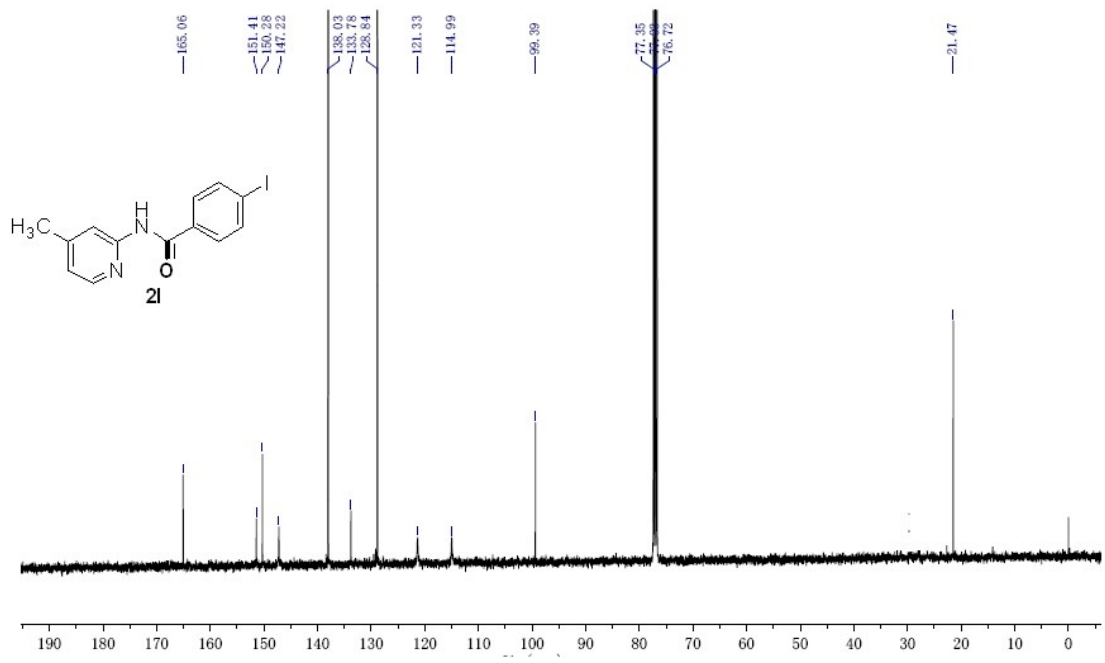

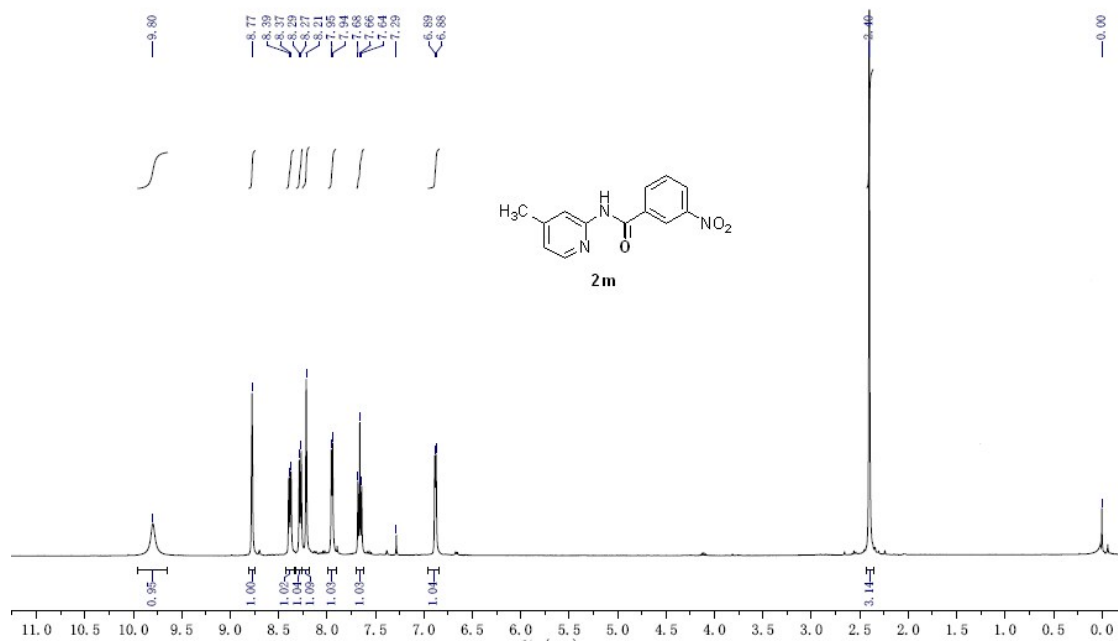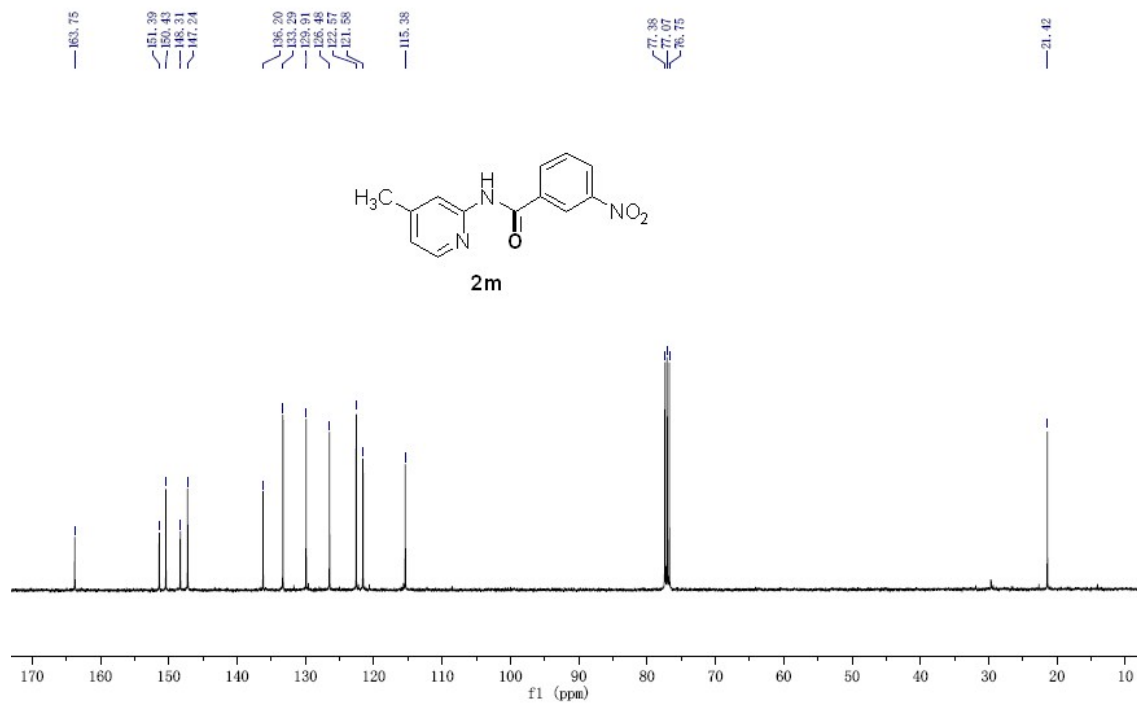

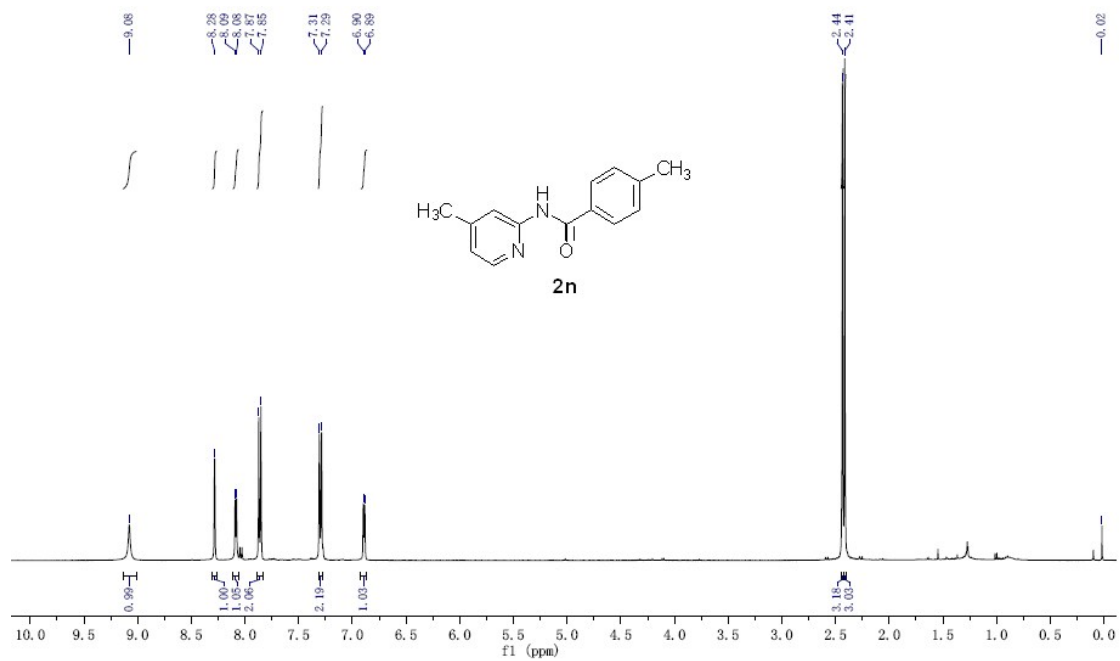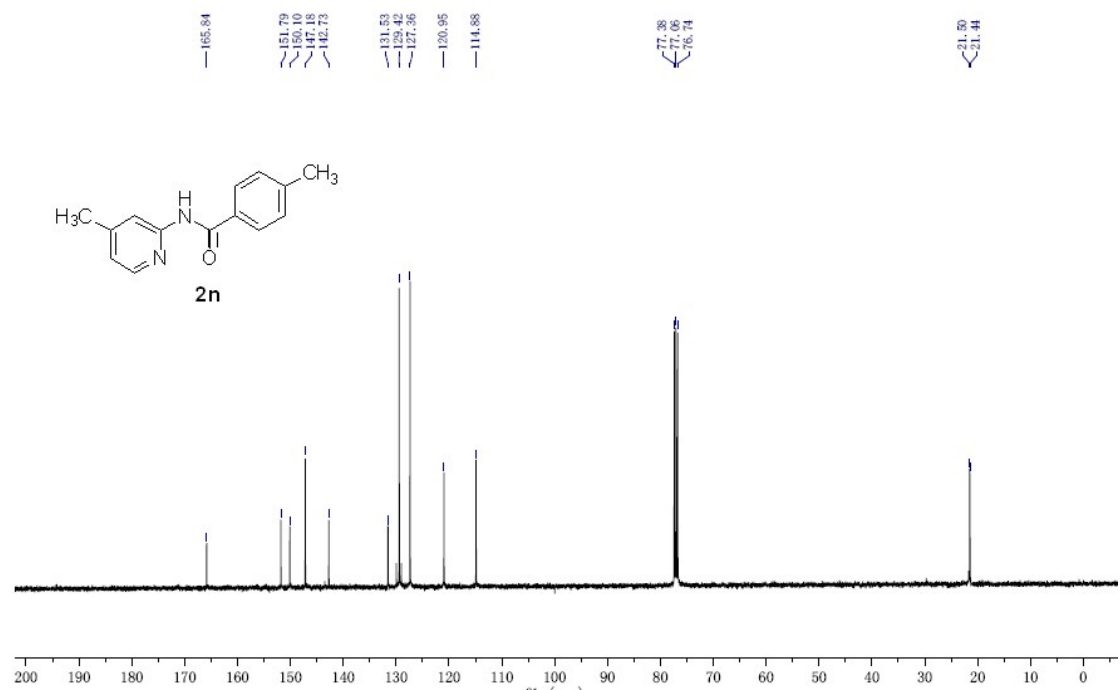

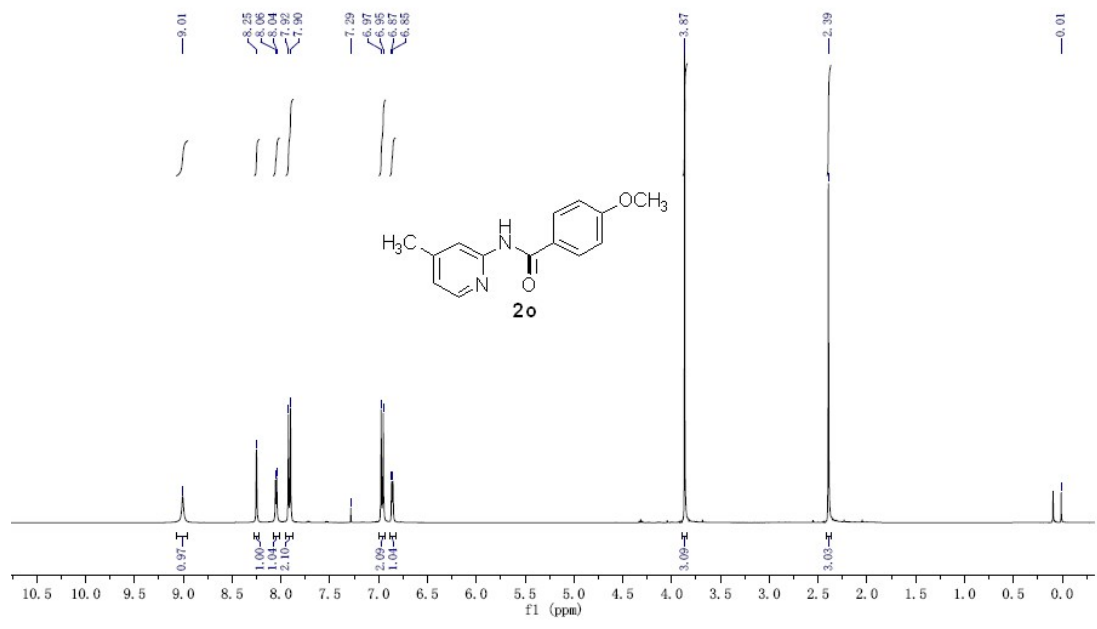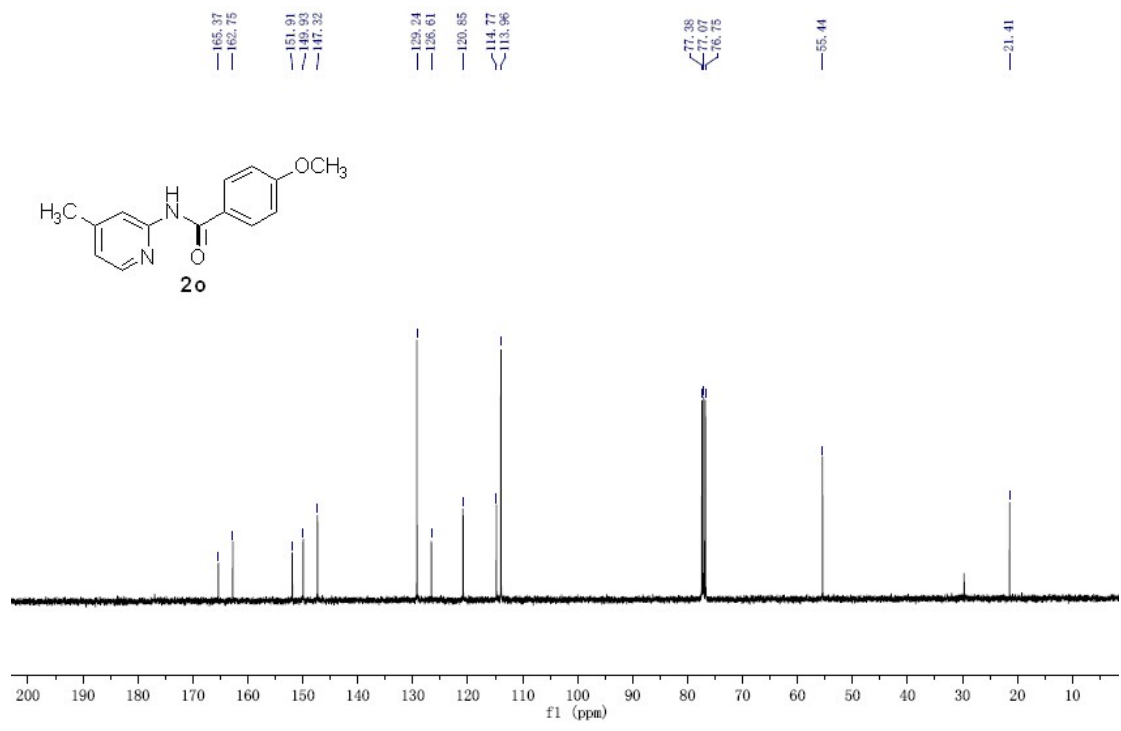

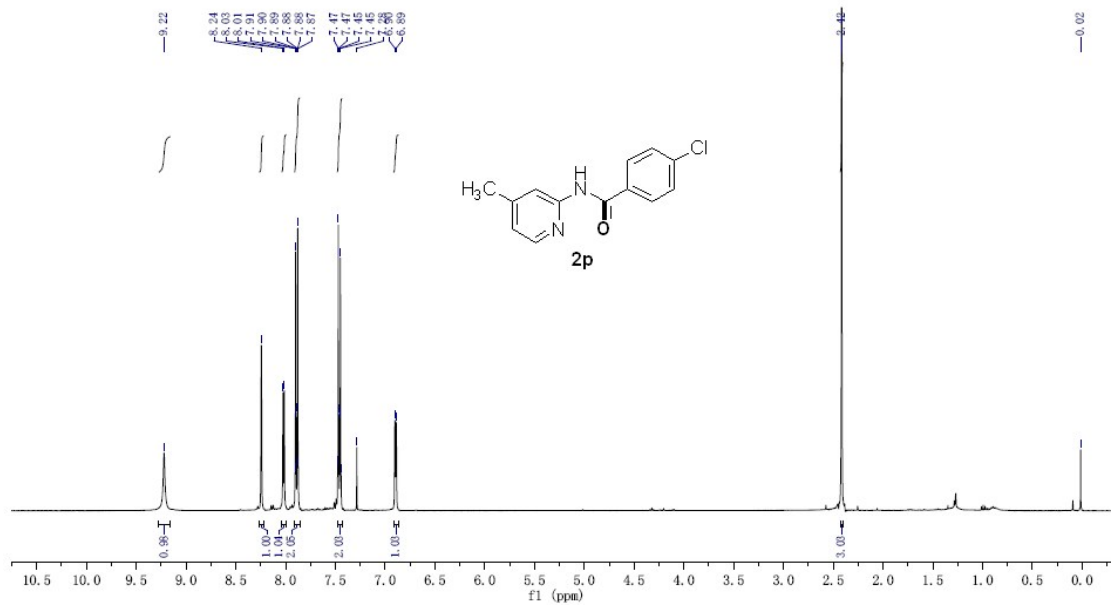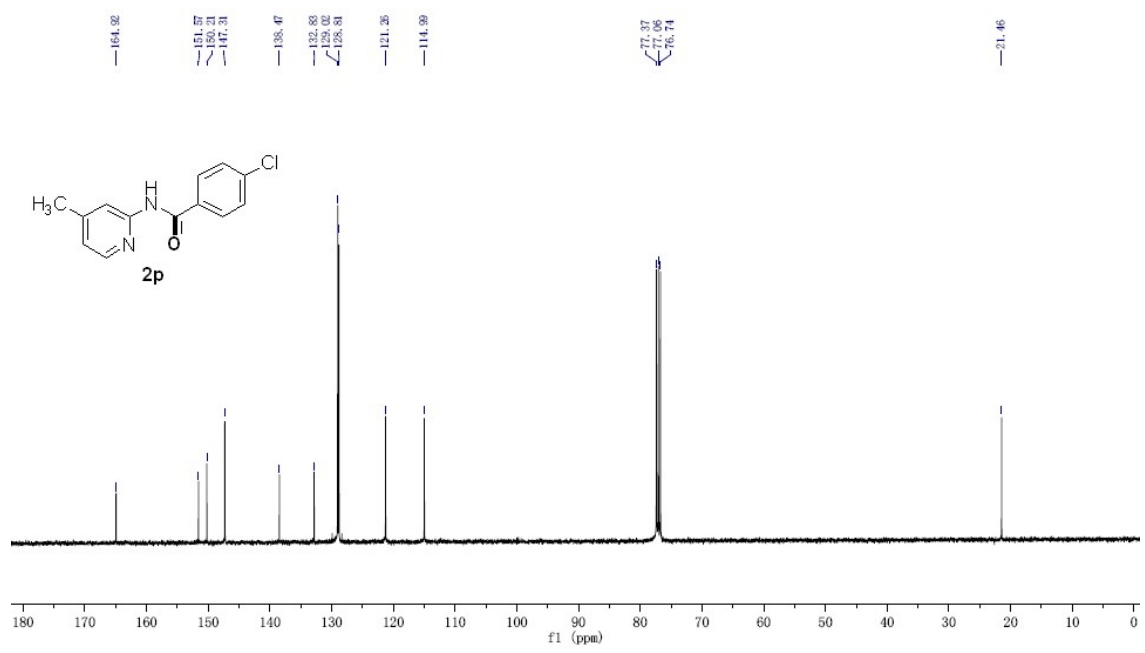



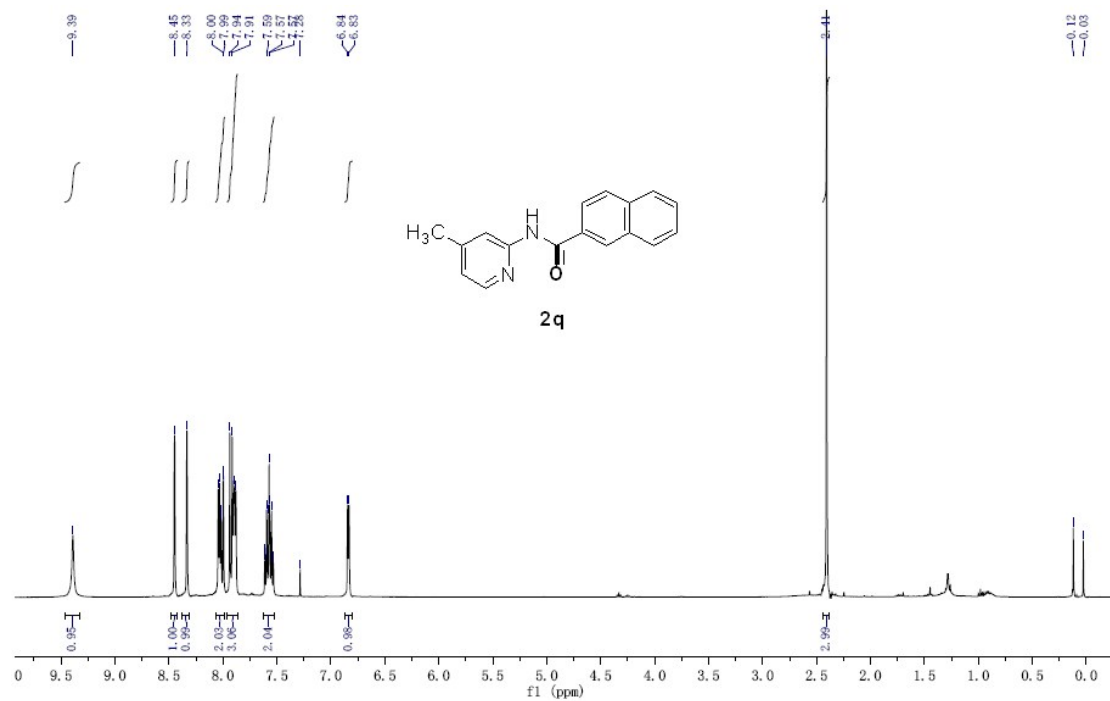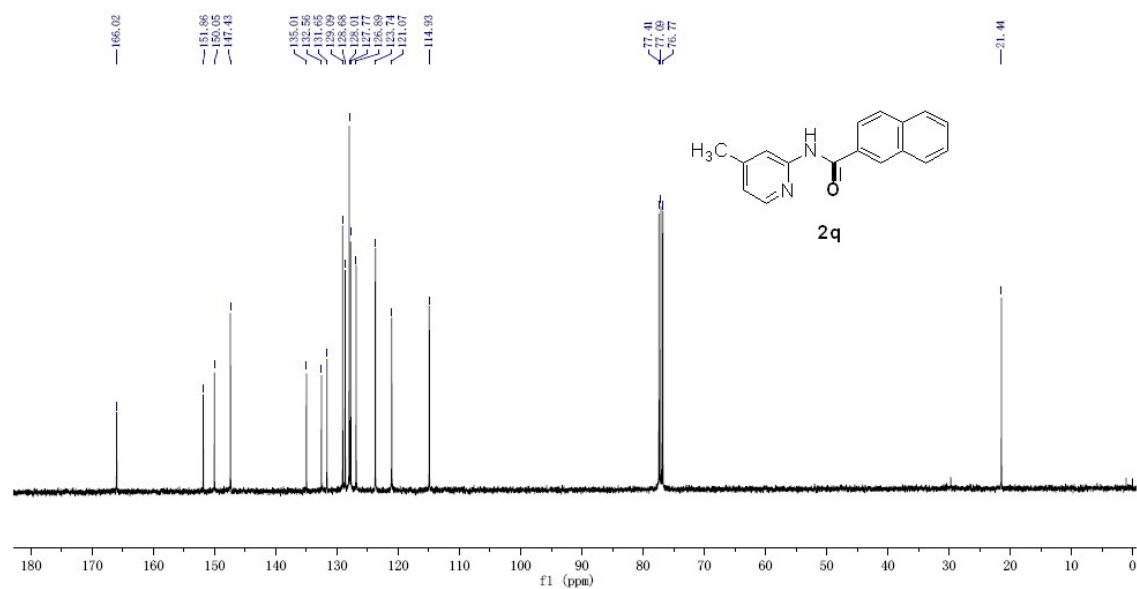

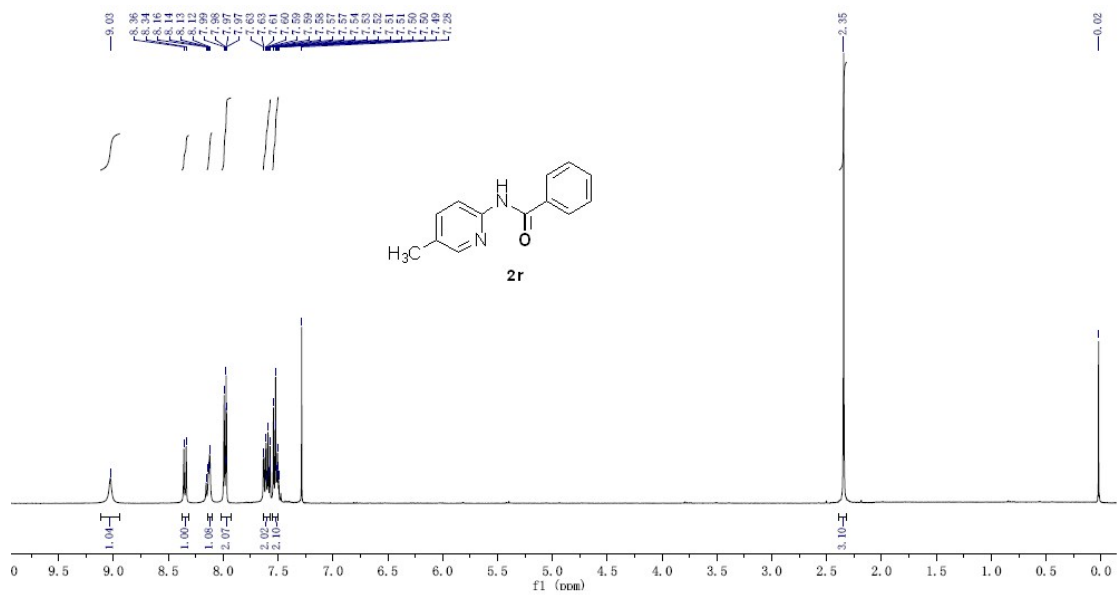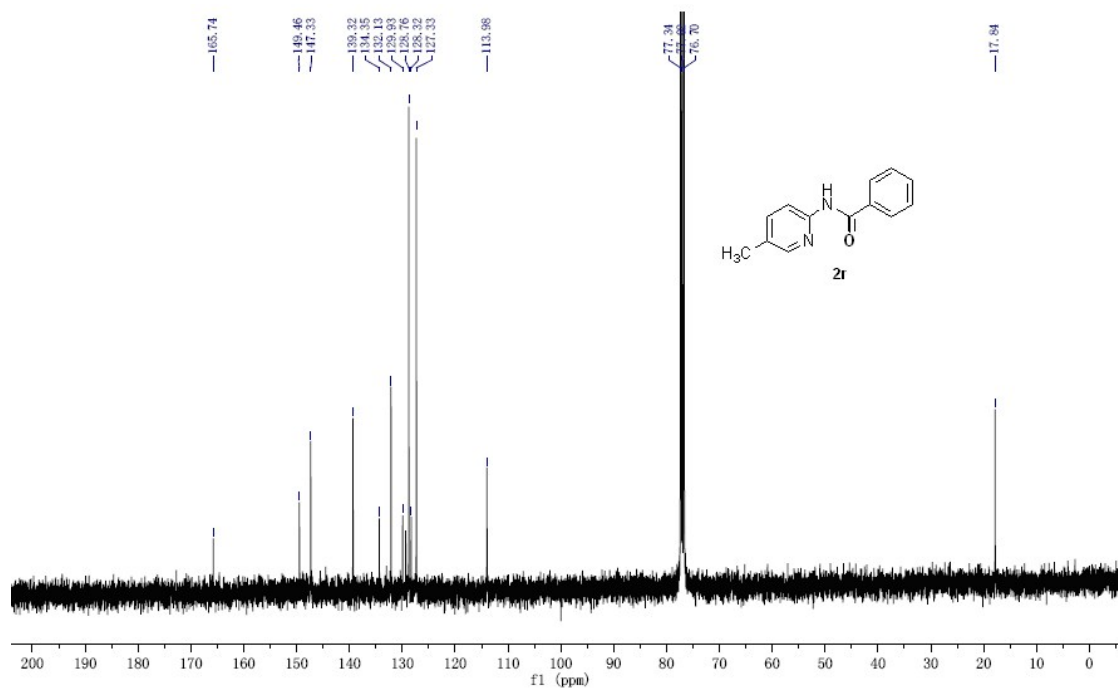

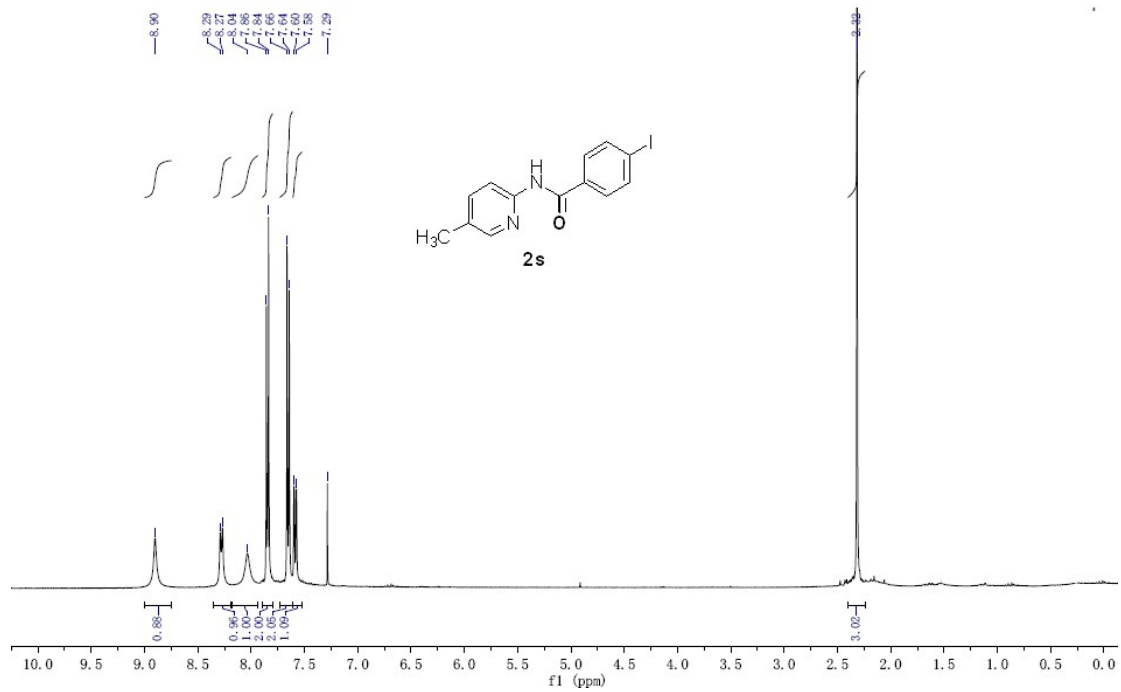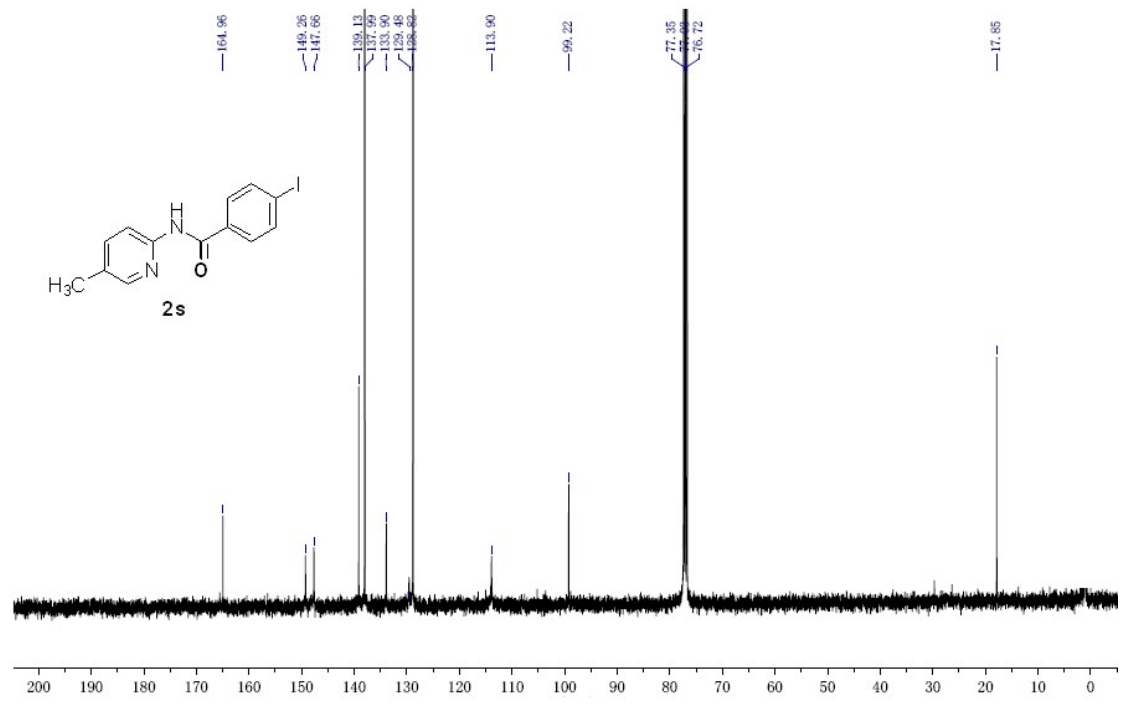

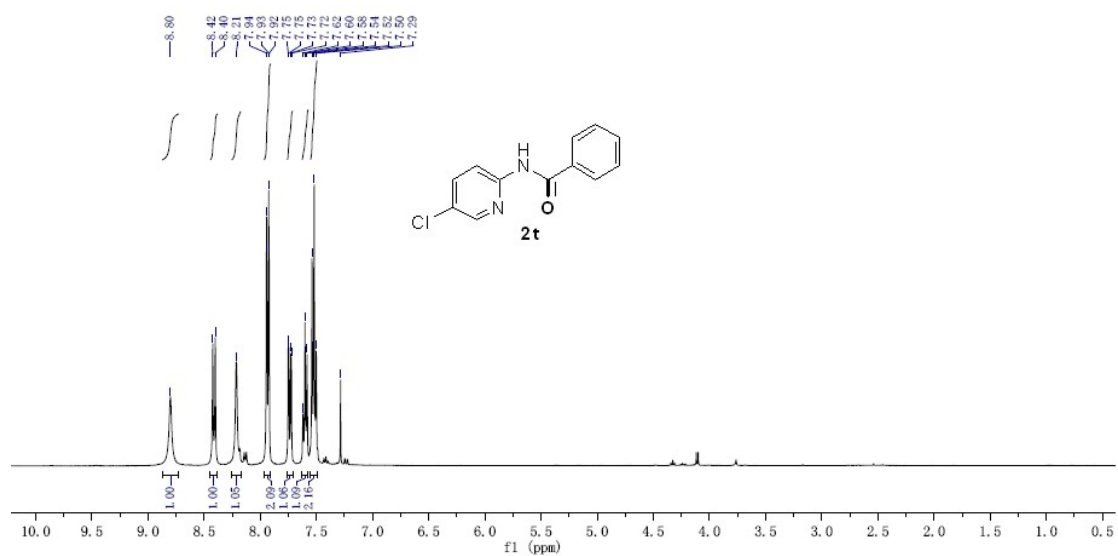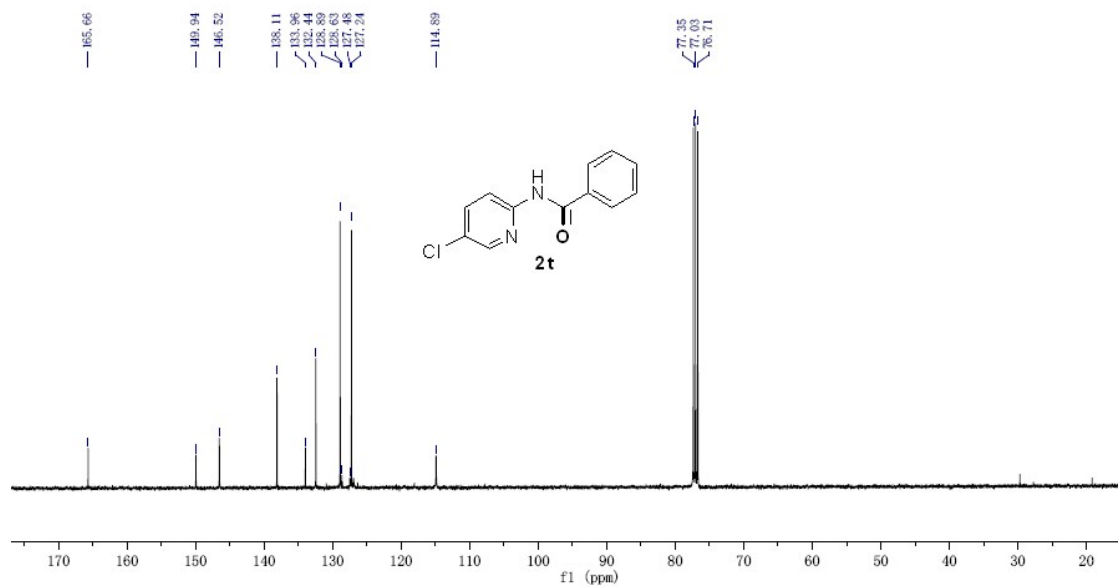

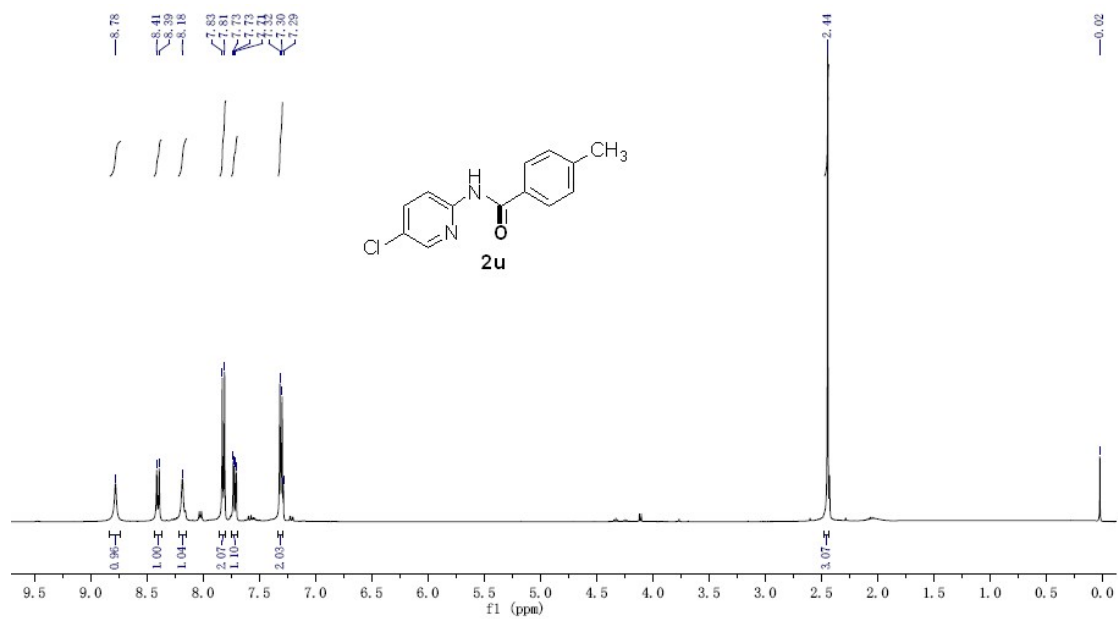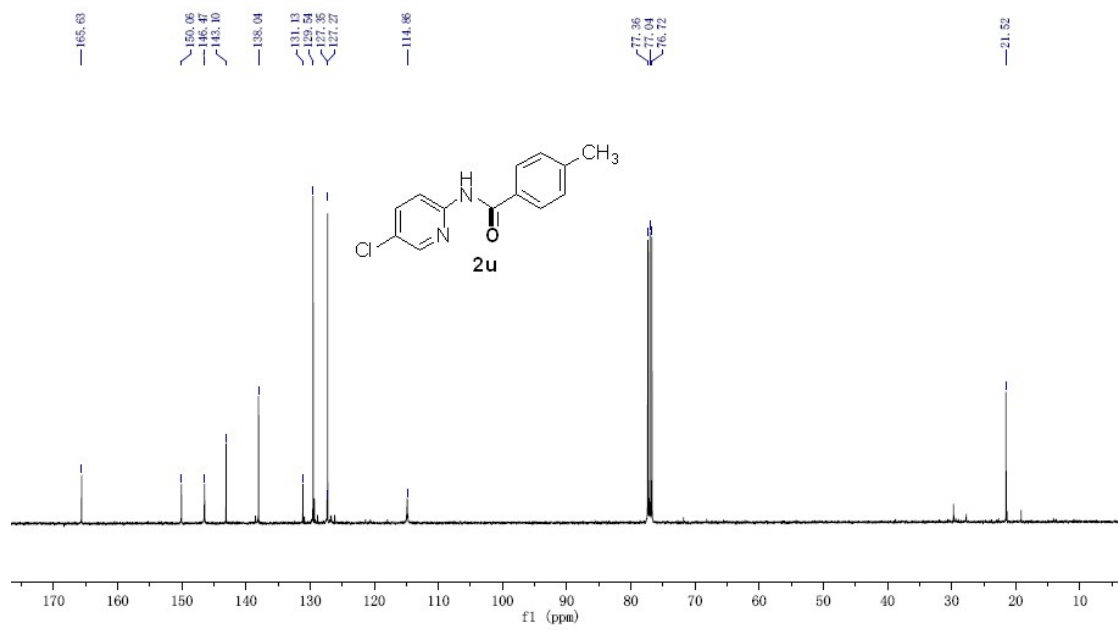

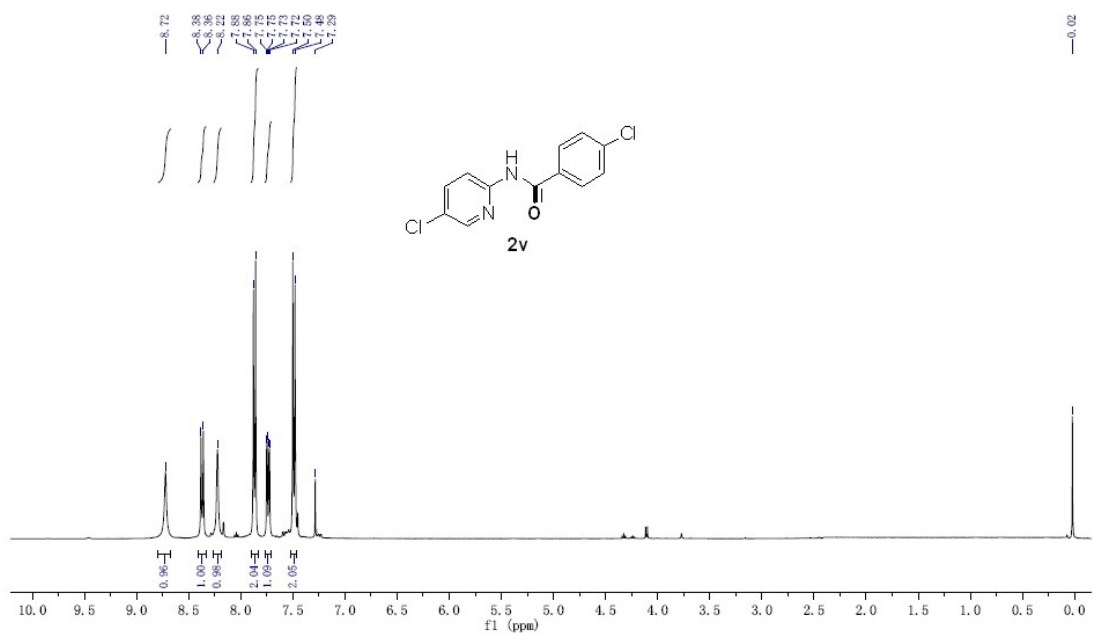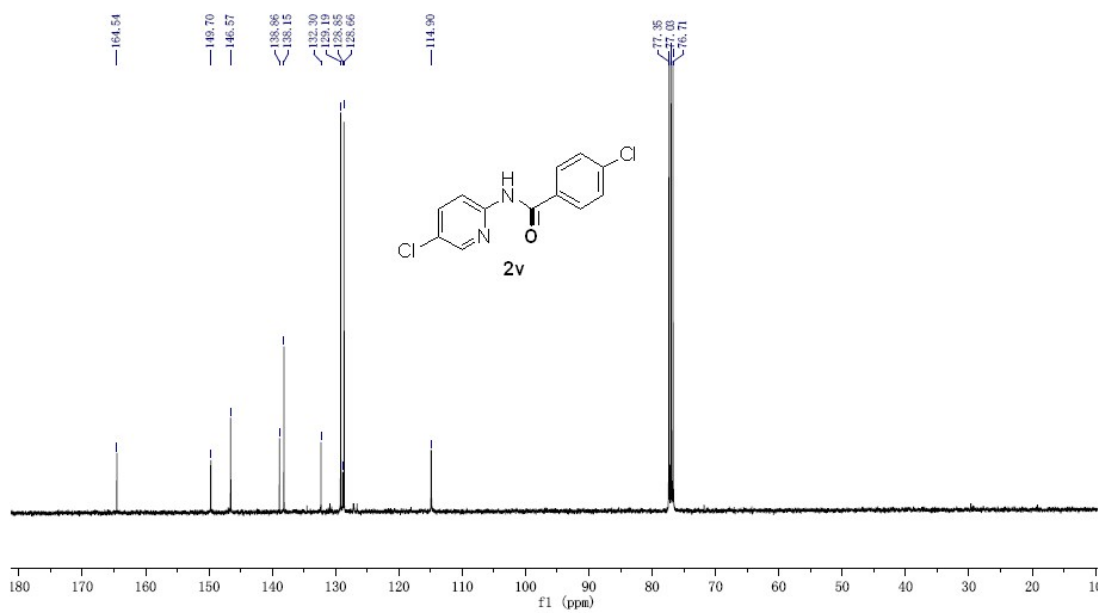

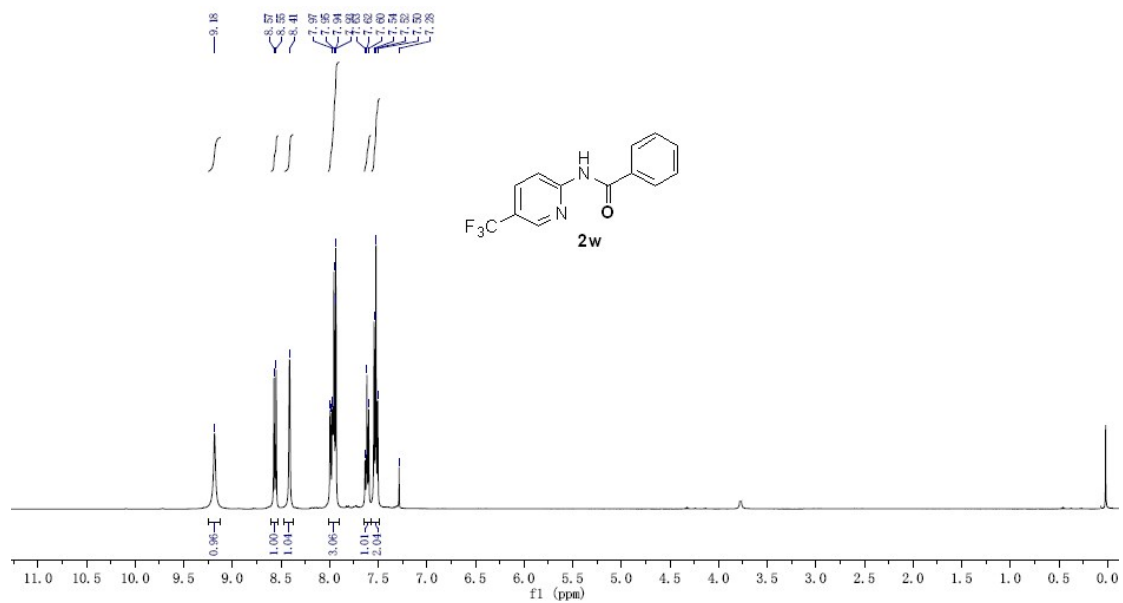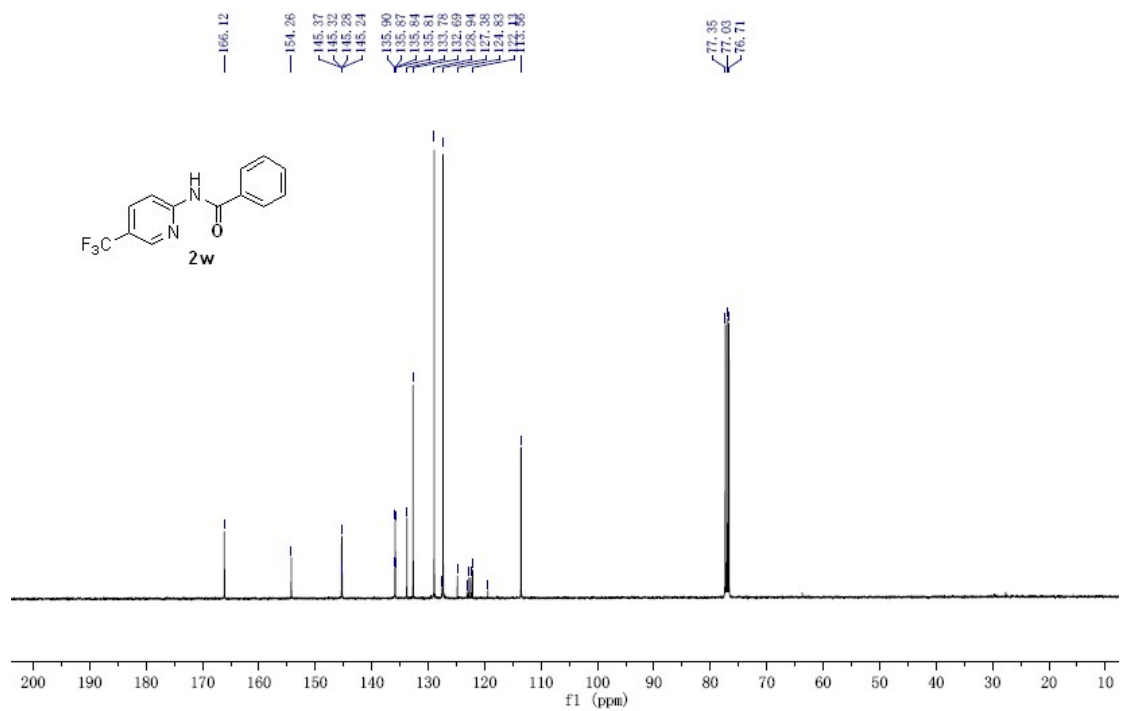

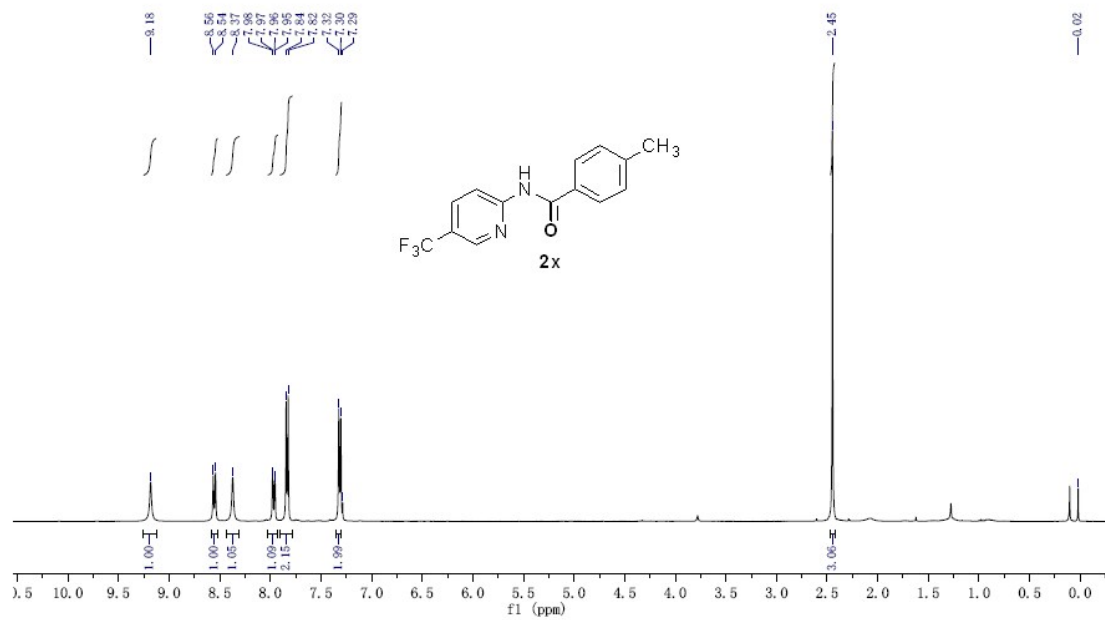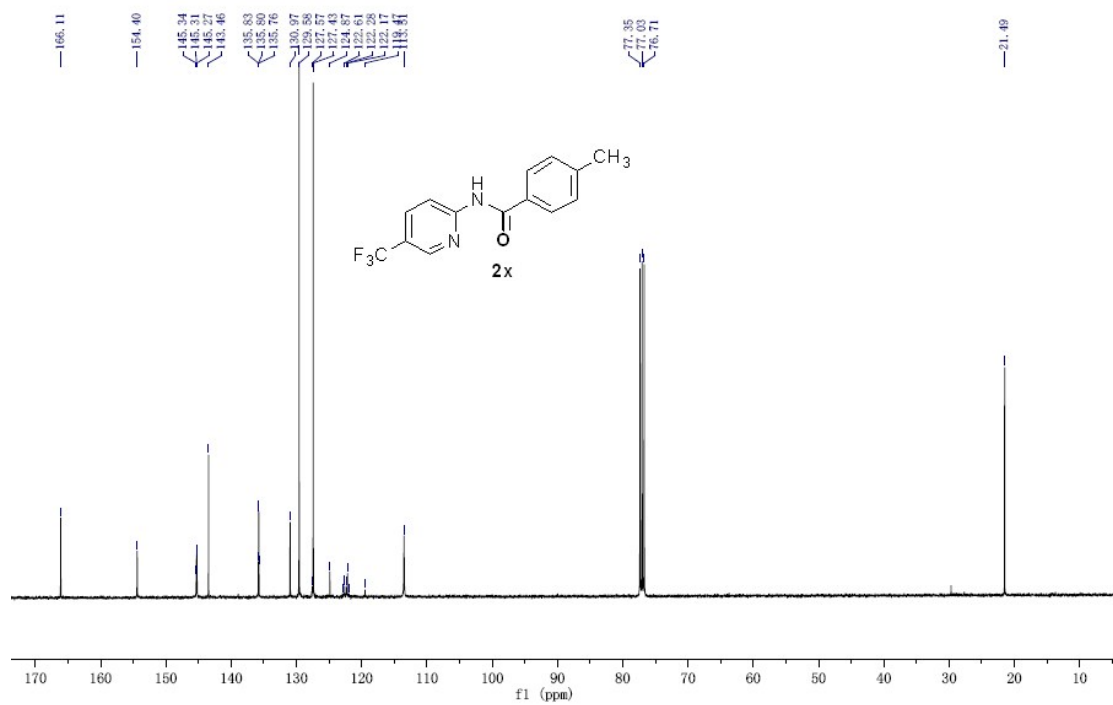



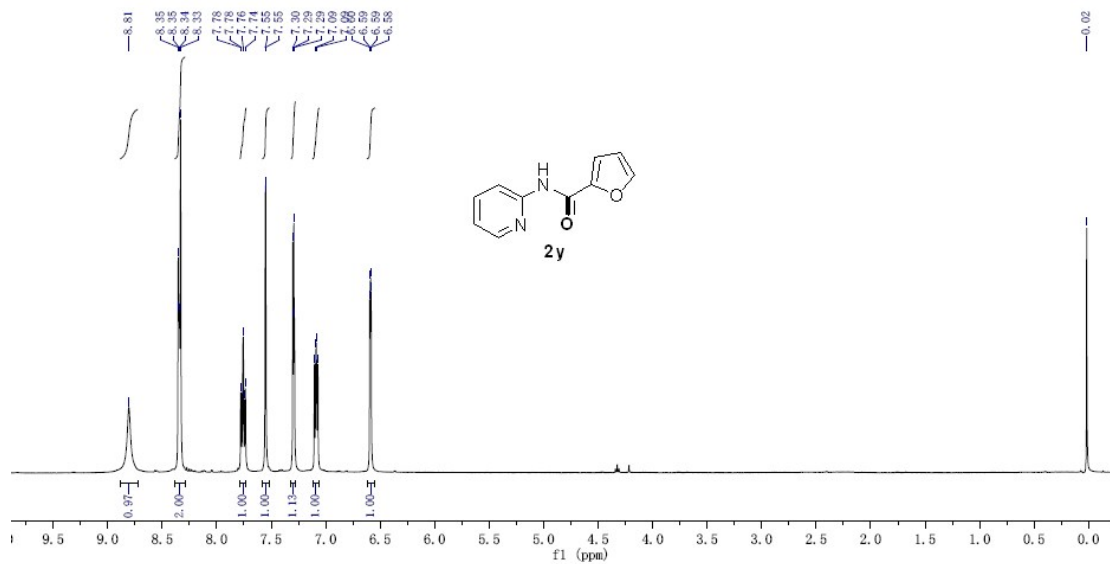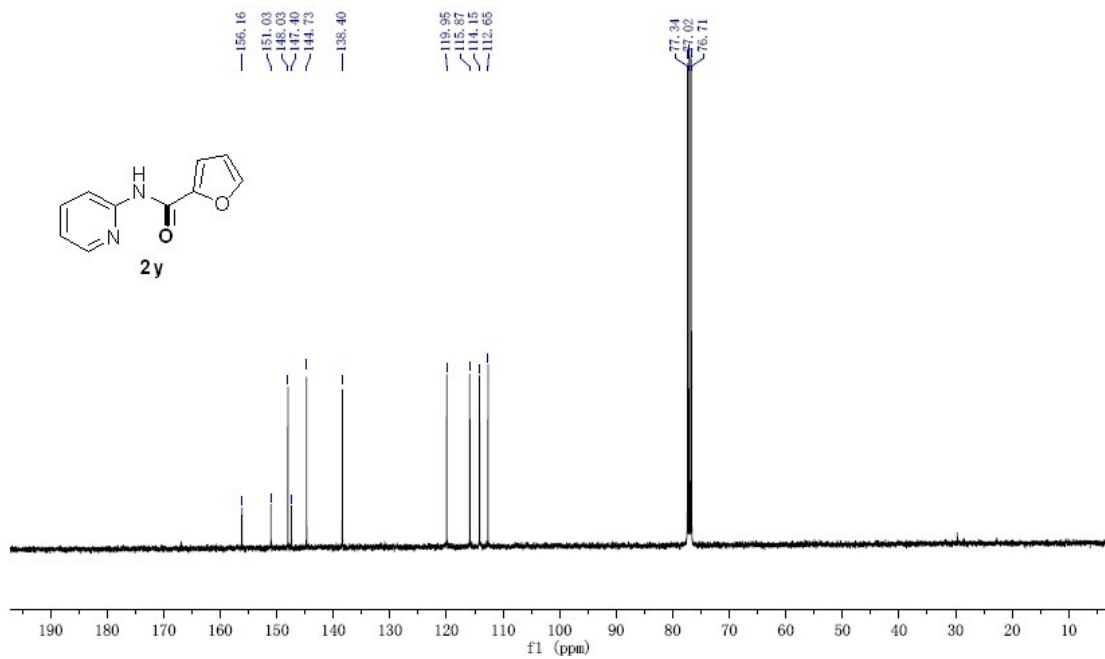

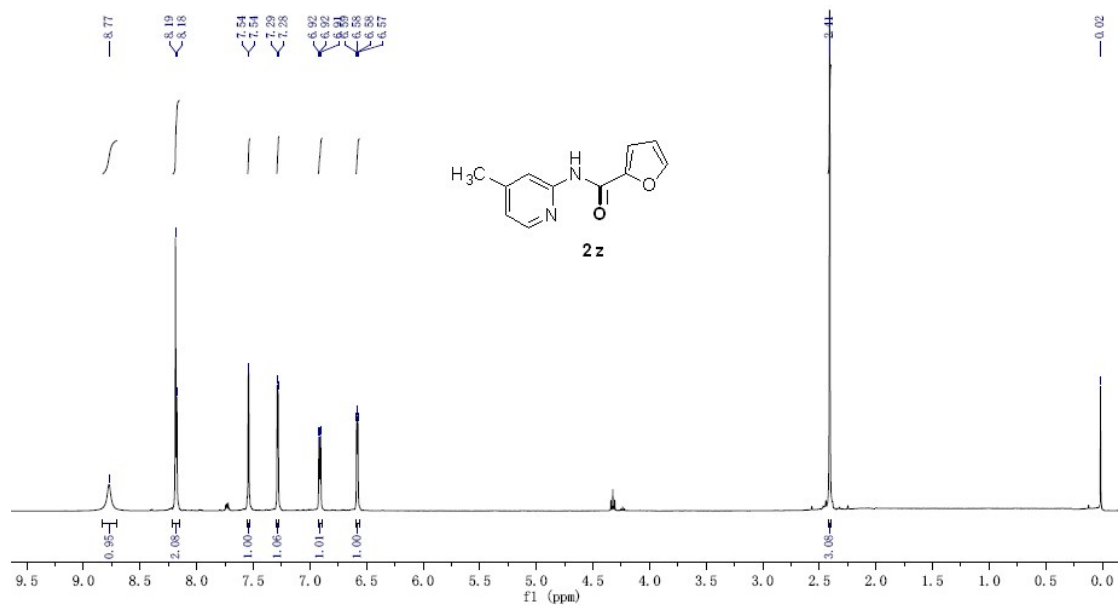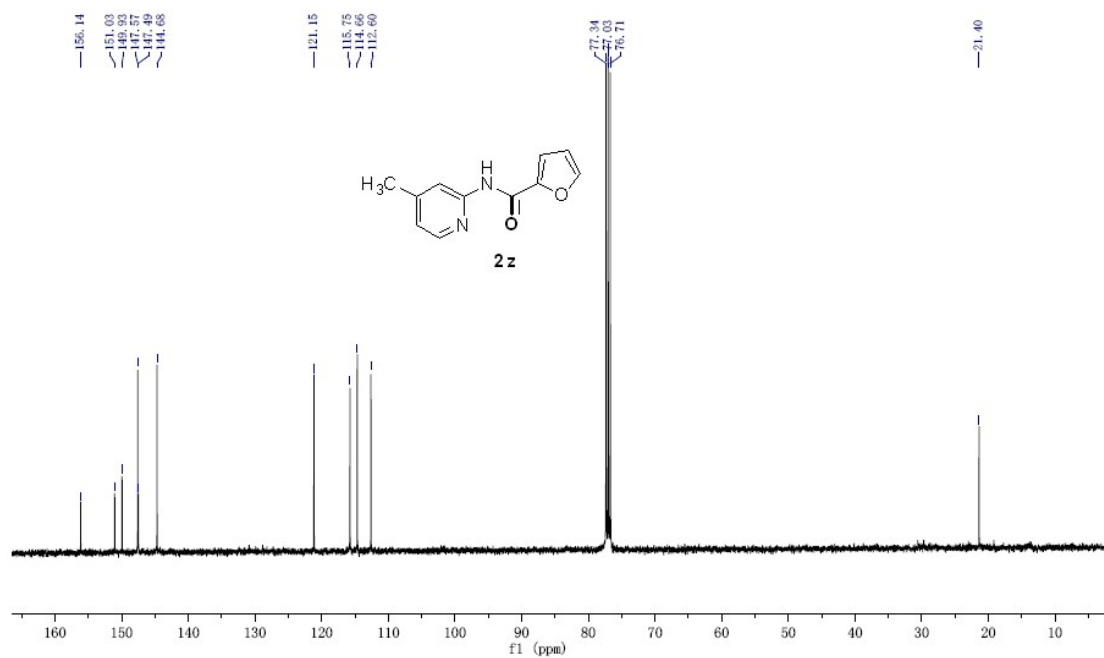

Supplement: c5ra17740e1.pdf [file c5ra17740e1.pdf]
